# Supplementary material
Source: PubMed Central journal article supplement (PMC5385296)
Supplement: NIHMS848840-supplement.pdf [file NIHMS848840-supplement.pdf]

# Genetics of early onset Parkinson's disease in Finland: exome sequencing and genome-wide association study

## SUPPLEMENTARY MATERIAL:

### Contents

|                                                                       |    |
|-----------------------------------------------------------------------|----|
| Acknowledgments.....                                                  | 3  |
| Subjects and methods.....                                             | 3  |
| Patients and controls.....                                            | 3  |
| Sample preparation and pre-processing.....                            | 4  |
| Genome-wide association study (GWAS).....                             | 4  |
| Quality control.....                                                  | 4  |
| Imputation.....                                                       | 5  |
| Analysis.....                                                         | 5  |
| Exome sequencing.....                                                 | 6  |
| Quality control.....                                                  | 6  |
| Analysis.....                                                         | 7  |
| Monogenic characterization and characterization of risk loci.....     | 8  |
| Power analysis.....                                                   | 8  |
| Variant ratio equation.....                                           | 9  |
| Results.....                                                          | 10 |
| Genome wide association study.....                                    | 10 |
| Exome sequencing.....                                                 | 10 |
| Monogenic characterization and a characterization of risk loci.....   | 10 |
| Characterization of genes with possible association to PD.....        | 11 |
| CEL.....                                                              | 11 |
| MPHOSPH10.....                                                        | 12 |
| ANKRD36.....                                                          | 12 |
| GPR126.....                                                           | 12 |
| TAS2R19.....                                                          | 12 |
| SERPINA1.....                                                         | 12 |
| ZNF519.....                                                           | 13 |
| PABPC1.....                                                           | 13 |
| SUPPLEMENTARY TABLES AND FIGURES.....                                 | 15 |
| Figure S1 Manhattan plot of imputed GWAS single variant analysis..... | 15 |

|                                                                                                                                                                                             |    |
|---------------------------------------------------------------------------------------------------------------------------------------------------------------------------------------------|----|
| Figure S2 Manhattan plot for single variant associations in WES. ....                                                                                                                       | 15 |
| Figure S3 Manhattan plot for rare variant analysis in WES discovery dataset, using Burden, MB and SKAT tests with all variants with functional significance at MAF < 0.05. ....             | 17 |
| Table S3 Genes within significant loci associated to PD in a recent meta-analysis. ....                                                                                                     | 18 |
| Table S4. Variants with the most significant p values in imputed GWAS study single variant analysis. ....                                                                                   | 19 |
| Table S5 Characterization of variants significant in WES discovery dataset SVA analysis that are also found in replication dataset. ....                                                    | 20 |
| Table S6 Top 20 variants in WES discovery and replication datasets not found from Finnish individuals in Exome Aggregation Consortium. Sorted by Odds ratio (OR). ....                      | 21 |
| Table S7 Burden, MB and SKAT test results in WES study. Using all nonsynonymous variants at MAF < 0.05. ....                                                                                | 22 |
| Table S8 Characterization of variants significant in WES discovery dataset in gene-based tests and found also in replication datasets. ....                                                 | 24 |
| Table S9 Variant count and burden test p values of the genes associated with PD, non-PD genes that may present with Parkinsonism and unconfirmed genes that may be associated with PD. .... | 25 |
| Table S10 Difference of variant counts and variant rates in WES discovery dataset in known PD genes. ....                                                                                   | 26 |
| Table S11 SNPEff putative impact classes. ....                                                                                                                                              | 27 |
| Table S12 Statistical post-hoc power of burden analysis in all variants in known PD genes. ....                                                                                             | 28 |
| Table S13 CEL variants in WES discovery dataset. ....                                                                                                                                       | 29 |
| Table S14 <i>CEL</i> variants in WES replication dataset. ....                                                                                                                              | 31 |
| Table S15 Genes closest to significant loci in GWAS analysis of the Finnish PD cohort. ....                                                                                                 | 32 |
| Table S16 Imputed GWAS study, gene-set analysis top hits with Burden test. ....                                                                                                             | 33 |
| Table S17 Imputed GWAS study, gene-set analysis top hits with SKAT test. ....                                                                                                               | 34 |
| Table S18 Ten most significant p values in WES discovery dataset near (+/-1 Mbp) of the known PD risk loci. ...                                                                             | 35 |
| Table S19 Variant count and call rate in WES discovery dataset. ....                                                                                                                        | 36 |
| Table S20 Quality control values (GATK) of the WES discovery dataset top hits that were found also in replication dataset. ....                                                             | 37 |
| Table S21 Quality control values (GATK) of WES discovery dataset variants that were used in Gene-based analysis. ....                                                                       | 37 |
| Figure S5 Statistical power of single variant given known allele frequency in WES discovery dataset, using different odds ratio values. ....                                                | 43 |
| Figure S6 Statistical power of single variant rs141620200 given known allele frequency in WES discovery dataset, using different odds ratio and risk ratio values. ....                     | 44 |
| References. ....                                                                                                                                                                            | 45 |

## Acknowledgments

This work was supported by the Intramural Research Program of the National Institute on Aging, National Institutes of Health, Department of Health and Human Services [project Z01 AG000958-09]. The study was supported by grants from the Council for Health Research of the Academy of Finland [project 127764]; Sigrid Juselius Foundation; Asla-Fulbright Foundation; Orion-Farmos Foundation; The Finnish Parkinson Foundation; Medical Research Center Oulu Doctoral Programme; The Finnish Medical Foundation; Oulun Duodecim-seura; University of Oulu Graduate School; and Oulun Lääketieteellinen Tutkimussäätiö. The authors wish to acknowledge CSC – IT Center for Science, Finland, for computational resources. We also thank NIH GWAS Data Repository for providing control samples to this study.

The FUSION study was conducted by the FUSION Investigators and supported by the National Institute of Diabetes and Digestive and Kidney Diseases (NIDDK). The data and samples from the FUSION study reported here were supplied by the NIDDK Central Repositories. This manuscript was not prepared in collaboration with Investigators of the FUSION study and does not necessarily reflect the opinions or views of the FUSION study, the NIDDK Central Repositories, or the NIDDK.

The NFBC1966 Study is conducted and supported by the National Heart, Lung, and Blood Institute (NHLBI) in collaboration with the Broad Institute, UCLA, University of Oulu, and the National Institute for Health and Welfare in Finland. This manuscript was not prepared in collaboration with investigators of the NFBC1966 Study and does not necessarily reflect the opinions or views of the NFBC1966 Study Investigators, Broad Institute, UCLA, University of Oulu, National Institute for Health and Welfare in Finland and the NHLBI.

Michael A. Nalls' participation is supported by a consulting contract between Kelly Services and the National Institute on Aging, NIH, Bethesda, MD, USA.

## Subjects and methods

### Patients and controls

In Finland, patients with PD are entitled to reimbursement of medicine expenses by the Social Insurance Institute (Kela). We have previously identified 1090 patients with EOPD nationwide in the Kela reimbursement database, and obtained a blood sample from 441 patients, who volunteered to participate in the study (Ylikotila et al., 2015). The study was approved by the Ethics Committee of the Turku University Hospital.

The STAMPEED dataset includes samples from the Northern Finland Birth Cohort 1966 (NFBC1966). In this cohort whole exome sequencing has been performed on 586 samples by using the Illumina platform. The FUSION dataset includes samples from the Finland-United States Investigation of NIDDM Genetics study. In this dataset there are 1161 patients with type 2 diabetes and 1174 subjects with normal glucose tolerance that were genotyped on HumanHap300v1.1 array. Permission to use these data was requested from dbGaP (phs000276.v2.p1 and phs000100.v4.p1) (Tryka et al., 2014).

### Sample preparation and pre-processing

DNA was extracted from blood and DNA libraries were prepared using either the Nextera Rapid Capture Expanded Exome Kit (first set) or the TruSeq Exome Library Prep Kit, according to the manufacturer's protocol (Illumina, San Diego, CA, USA). Indexed and pooled libraries of 12 samples each were paired-end sequenced on three lanes using HiSeq2000 runs (Illumina, San Diego, CA, USA).

Raw data was processed to FastQ files using Illumina's BaseSpace utility. Files were prepared from Fastq files to BAM using Human genome assembly 19, Burrows-Wheeler aligner (BWA)(Li and Durbin, 2009) and to analysis-ready variants by following Genome Analysis Toolkit (GATK, ver. 3.1) best practices pipeline (DePristo et al., 2011, Van der Auwera et al., 2002). The 10 x depth of the contigs was at least 90 % and the 30 x depth of the contigs was an average of approximately 70 %. The variants were filtered by using 99.9% tranche. Variants that passed the filter were selected for subsequent analysis. Data was processed using Plink version 1.90 (Chang et al., 2015) after group variant sets were called and converted to binary format.

### Genome-wide association study (GWAS)

Sample preparation and genotyping of the cases has been published elsewhere (Hernandez et al., 2012).

### Quality control

Quality control exclusion of the variants was as follows: SNPs with missingness less than 95% by genotyping call rate, missingness by individual less than 90%, minor allele frequency (MAF) less than 5%, Hardy-Weinberg equilibrium (HWE) p value less than  $1E-5$ . SNPs ambiguous to strand (A/T and G/C) were removed. Samples with wrong gender-information were removed. Missingness in cases compared to controls p value (from chi-squared test)  $<1E-5$  and nonrandom missingness by haplotype (from chi-squared test)  $<1E-5$ . The case-control series then underwent the calculation of pairwise identity by descent, excluding any samples sharing greater than a 0.185 proportion of alleles

( $\Phi_{\text{hat}} > 0.185$ ) to remove probands from related pairs, excluding all first, second and third degree relatives.

Heterozygous outliers (deviate more than  $3 \times \text{SD}$  from mean observed heterozygosity rate) were removed.

Duplications were removed. Population outliers were removed. 403 cases and 1650 controls passed quality checks.

Cases and controls were merged using Plink/Seq tool (<https://atgu.mgh.harvard.edu/plinkseq/>).

## Imputation

Files were prepared for imputation as follows: To validate vcf files, HRC preparation checking Tool suggested by Sanger Institute's imputation service was used. Genomic inflation factor before imputation was 1.027. The inflation factor for an equivalent study of 1000 cases and 1000 controls is 1.041681. Before imputation there were 256,546 variants.

Imputation was done using Sanger Institute's imputation service with 1000 Genomes Phase 3 reference panel.

Imputation server uses SHAPEIT2 (Delaneau et al., 2013) for pre-phasing variants and PBWT (Durbin, 2014) algorithm for imputation.

After imputation dataset variants with alternative allele count less than 1, imputation quality score (estimated haploid dosage  $r^2$  from imputation) less than 0.5 and MAF less than 0.1% were filtered. Genomic inflation factor after imputation was 1.00 and quantile-quantile plot of p values did not reveal any systemic biases. After quality control 12,954,715 variants were left for the analysis.

## Analysis

Single variant association (SVA) analysis was done using 'Efficient and parallelizable association container toolbox' (EPACTS) (<http://genome.sph.umich.edu/wiki/EPACTS>) with EMMAX (Kang et al., 2010) test. Variants with minor allele frequency (MAF)  $< 0.1\%$  were excluded. We used *LocusZoom* (Pruim et al., 2010) to generate regional gene sets from the GWAS. A genome wide significant p value was set at  $p < 5 \times 10^{-8}$ .

Gene-based tests were carried out by using EPACTS with default settings. Kinship information from a variance component model was used to handle possible distant family relationships within the population. The EmmaxCMC (burden test) and sequence kernel association test (SKAT, performed with SKAT-O) were used. Gene-based analysis used variants with MAF less than 5% and with assumed functional significance (nonsynonymous, Essential Splice

Site, Normal Splice Site, Start Loss, Stop Loss, Stop Gain). The first 20 principal components (based on variance-standardized relationship matrix), age at sampling year, sex, and type 2 diabetes diagnosis in controls were used as covariates for both the SVA and gene-based tests.

## Exome sequencing

### Quality control

Supplementary tables S1 and S2 present the quality control steps made for WES discovery dataset. Before Quality control (QC) there was 238 cases and 563 controls with total of 411,343 variants. Insertion to deletion ratio was 1.02 for all, 0.87 for known (dbSNP 138 excluding sites after 129) and 1.08 for novel indels. Ti/Tv ratio was 2.26 for all, 2.62 for known (dbSNP 138 excluding sites after 129) and 2.09 for novel. QC exclusion of the variants was as follows: SNPs with missingness less than 95% by genotyping call rate, missingness by individual less than 90%, minor allele frequency (MAF) less than 10%, Hardy-Weinberg equilibrium (HWE) p value less than  $1E-5$ . Samples with wrong gender-information were removed. Missingness in cases compared to controls p value  $<1E-5$  (from chi-squared test) and non-random missingness by haplotype  $<1E-5$  (from chi-squared test). The case-control series then underwent the calculation of pairwise identity by descent, excluding any samples sharing greater than a 0.185 proportion of alleles ( $\Phi_{\hat{}} > 0.185$ ) to extract probands from related pairs, effectively excluding all first, second and third degree relatives. Heterozygous outliers (deviate more than  $3*SD$  from mean observed heterozygosity rate) were removed. Duplications were removed. Population outliers were removed (samples that deviated more than  $2*SD$  from mean of the observed two first principal components when comparing to aggregate European reference samples). After this QC there were 216 cases, 558 controls and 120,579 variants.

In the second QC step individuals that deviated more than  $\pm 2*SD$  from the following statistics were removed (calculated using PlinkSeq, <https://atgu.mgh.harvard.edu/plinkseq/index.shtml>, individual statistics): Number of non-reference genotypes, Number of genotypes with a minor allele, Number of heterozygous genotypes for individual, Total number of called variants for individual, Genotyping rate for individual, Number of singletons individual has and mean Ti/Tv for variants. After removing individuals failing previous statistics, we removed variants with missingness less than 99% by genotyping call rate. The final dataset had 185 cases and 480 controls; 337 males and 328 females with 112,838 variants after the second QC. Genotype rate was 0.999. Ti/Tv ratio was 2.77 for all, 3.16

for known (dbsnp 138 excluding sites after 129) and 2.47 for novel variants. Selecting only exonic intervals (UCSC Genes) Ti/Tv ratio was 2.98, 3.4 and 2.65, respectively. Genomic inflation factor was 0.921.

Table S1 Stage I quality control (QC) steps in WES discovery dataset.

| Before QC: Cases, N=238; Controls, N=563; Variants = 411,343 |                                                                                                                                                 |
|--------------------------------------------------------------|-------------------------------------------------------------------------------------------------------------------------------------------------|
| 1.                                                           | Removed non-random missingness between cases and controls, cutoff $P < 1E-4$                                                                    |
| 2.                                                           | Removed samples with wrong sex-information (reported vs genetically derived)                                                                    |
| 3.                                                           | Removed variants with missingness by call rate more than 5%                                                                                     |
| 4.                                                           | Removed samples with variant missingness by individual more than 10%                                                                            |
| 5.                                                           | Hardy-Weinberg fail threshold $1E-4$                                                                                                            |
| 6.                                                           | Removed heterozygous outliers; deviation from mean observed heterozygosity rate $< 3*SD$                                                        |
| 7.                                                           | Removed samples that fail IBD check (relatedness), $\Phi\text{-hat} > 0.185$                                                                    |
| 8.                                                           | Minor allele frequency less than 10%                                                                                                            |
| 9.                                                           | Removed ancestry outliers comparing to aggregate European reference samples; samples that deviate more than 2SD from observed mean in PC1 & PC2 |
| After QC: Cases, N=216; Controls, N=558; Variants = 120,579  |                                                                                                                                                 |

Key: IBD, identity by descent;  $\Phi\text{-hat}$ , proportion of IBD; PC, principal component; SD, standard deviation.

Table S2 Stage II quality control steps in WES discovery dataset.

| Before QC: Cases, N=216; Controls, N=558; Variants = 120,579                                               |                                                                                          |
|------------------------------------------------------------------------------------------------------------|------------------------------------------------------------------------------------------|
| •                                                                                                          | <b>Removed samples that deviate more than 2SD from observed mean in each statistics:</b> |
| ➤                                                                                                          | Number of non-reference genotypes                                                        |
| ➤                                                                                                          | Number of genotypes with a minor allele                                                  |
| ➤                                                                                                          | Number of heterozygous genotypes                                                         |
| ➤                                                                                                          | Total number of called variants                                                          |
| ➤                                                                                                          | Genotyping rate                                                                          |
| ➤                                                                                                          | Number of singletons                                                                     |
| ➤                                                                                                          | Mean Ti/Tv                                                                               |
| •                                                                                                          | <b>Removed variants with missingness &gt; 1%</b>                                         |
| After QC: Cases, N=185; Controls, N=480; Men, N=337; women, N=328; Variants = 112,838; Genotype rate 0.999 |                                                                                          |

Key: Ti/Tv, transition transversion ratio.

## Analysis

Kinship information from the variance component model was used to handle possible distant family relationships within the population. Single variant association (SVA) test was calculated using EMMAX test. Variants with MAF > 0.1% were used in the SVA test. . Gene-based analysis used variants with MAF < 5% and with assumed functional significance (nonsynonymous, Essential Splice Site, Normal Splice Site, Start Loss, Stop Loss, Stop Gain).

The first 20 principal components (based on variance-standardized relationship matrix), the first five components of the multidimensional scaling (based on raw Hamming distances) (Plink 1.9), sex, and exome sequencing batch information were used for both the SVA and gene-based tests as covariates. The batch information included the

identification code of the pooled library and the sequencing run the sample was in, and information if the sample was split between flow cells or not.

Using genetic data from cases only, genetic contributions to age at onset (AAO, based on age at first symptoms) were analyzed. No significant associations were found at a genome wide level of significance (data not shown).

Analysis was done using Raremetal and AAO trait was inverse normalized.

Functional annotations were done using Annovar (Wang et al., 2010), SNPEff (Cingolani et al., 2012b) and SNPSift (Cingolani et al., 2012a). Plink version 1.9 was used to transform file format and perform several QC steps. Candidate genes were ranked by mutation accumulation rates using recently published data (Shyr et al., 2014), in order to exclude highly mutated genes.

## Monogenic characterization and characterization of risk loci

Characterization of known PD genes and risk loci were done in the WES discovery dataset. Genes within 1 Mbp upstream or downstream of the loci identified in a meta-analysis (Nalls et al., 2014) were selected (supplementary table S3). In total, 372 genes fulfilled these criteria. R (Ihaka and Gentleman, 1996) library SKAT package's (<http://cran.r-project.org/web/packages/SKAT>) power calculator (Power\_Logistic function) was used post-hoc to estimate the power of the dataset. Analyses for genes in gene-based tests were done either with all variants, or selecting variants that alter amino acid sequence of a protein, defined here as nonsynonymous variants (nonsynonymous, Essential\_Splice\_Site, Normal\_Splice\_Site, Start\_Loss, Stop\_Loss, Stop\_Gain).

## Power analysis

In order to generate haplotypes for the samples, Shapelt2 with default settings was used. R library SKAT package's (<http://cran.r-project.org/web/packages/SKAT>) power calculator (Power\_Logistic function) was used to estimate the power of our dataset post-hoc. The following settings were used:

- 1) SubRegion.Length was set as the length of the (longest) target gene transcript.
- 2) N.Sample.ALL = number of samples in the dataset ( N=665 ).
- 3) Prevalence=0.02
- 4) Case.Prop=0.28 ( Cases, N=185 cases / Total, N=665 samples ).
- 5) Causal.Percent=100



- 6) Causal.MAF.Cutoff=0.03
- 7) N.Sim=1000
- 8) Weight.Param=c(1,25)
- 9) MaxOR=5

#### Variant ratio equation

Variant ratio is a value used to compare the ratio of variants per gene in cases versus controls. It is a division ( $MR^{\text{cases}}$  /  $MR^{\text{controls}}$ ). Formula of MR = Total number of variants divided by transcript length and number of samples and multiplied by 10,000,000 (bp). Canonical transcripts and transcript lengths are used in equations.

## Results

### Genome wide association study

The GWAS compared 403 cases and 1650 controls (1132 men, 921 women). In the single variant association test, 12 loci had genome-wide associations to PD ( $P < 5 \times 10^{-8}$ ) (Supplementary figure S1, supplementary table S4). None of the 24 previously identified loci (Nalls et al., 2014) showed significant association in the current data after Bonferroni correction. However, we found variants with close to significant associations with PD in similar but not identical loci near GBA (chr1:155820734), SIPA1L2 (chr1:233279538) and SNCA (chr4:90646501). Loci near ITGA8 (chr10:14376577) and NMD3 (chr3:160099190), which were not replicated in meta-analysis, had also variants with close to significant associations to PD.

GWAS SVA test revealed significant variants in a locus near the CEL gene. CEL was also significant ( $p < 2.5 \times 10^{-6}$ ) in gene-based burden test in WES discovery dataset, although the effect of the gene variation to PD was very small with odds ratio of 0.92 (95% confidence interval (CI); 0.88-0.96).

### Exome sequencing

All the candidate variants are nonsynonymous and result in amino acid change in the protein. The *GPR126* variant chr6:142758 results in an amino acid change (aa-change) that is predicted to be deleterious by SIFT (Kumar et al., 2009), Polyphen2 (Adzhubei et al., 2010), LRT (Chun and Fay, 2009) and MutationTaster (Schwarz et al., 2010). *TAS2R19* variant rs12424373 aa-change was predicted to be deleterious by SIFT. *SERPINA1* variant rs141620200 aa-change was predicted to be deleterious by SIFT, FATHMM (Shihab et al., 2013) and MetaLR (Dong et al., 2015). *SERPINA* variant rs17580 aa-change was predicted to be deleterious with SIFT, Polyphen2, LRT, MutationTaster, MutationAssessor (Reva et al., 2011) and FATHMM. Variants rs201600563 (*ANKRD3*), rs12424373 (*TAS2R19*) and rs61730995 (*ZNF519*) are located in a segmental duplication region. Also, all these candidate genes in table 1 have low FLAG (frequently mutated genes in public exomes) value indicating low general mutation rate.

### Monogenic characterization and a characterization of risk loci

Characteristics of genes currently associated to Parkinson's disease or parkinsonism are summarized in supplementary tables S9-S12. None of the p values of the burden test in known PD genes was significant (supplementary table S9), but variant count proportional to length of the gene's transcript is high with GRN and

PARK7 genes, when comparing cases to controls (supplementary table S10, where supplementary table S11 shows the putative impact classes used). Statistical post-hoc power of the burden tests in these known PD genes is generally low in our WES discovery dataset, ranging from 0.00015-0.43% with 1E-6 significance level in nonsynonymous variants and 0.00198-11.7% with 1E-6 significance level when calculated for all variants (supplementary table S12).

## Characterization of genes with possible association to PD

### CEL

Carboxyl-ester ligase (encoded as *CEL*, MIM114840) has a physiological role in cholesterol and lipid-soluble vitamin ester hydrolysis and absorption. It may also play role in platelet activation and thrombin formation (Panicot-Dubois et al., 2007). Gene has a highly polymorphic region of insertion/deletion type (Taylor et al., 1991) which may indicate that the association is a false positive finding in our study. The Diseases associated with *CEL* include maturity-onset diabetes of the young, type viii, and type 2 diabetes (Bengtsson-Ellmark et al., 2004, Raeder et al., 2006).

It is good to acknowledge that control population data in our GWAS study has several individuals with type 2 diabetes (T2D). However, in GWAS this has been adjusted by using the T2D phenotype as covariate in SVA and gene-based tests. Also, in WES study the population controls are from different cohort (Stampeed) and in spite of that *CEL* gene has statistical significance in gene-based test.

Variants in *CEL* locus were associated with PD in GWAS and those in *CEL* gene in WES analysis. Eight EOPD cases had *CEL* variants in common in the GWAS and WES datasets and six of them had the *CEL* variant chr9:135955826 (human genome assembly 19) in the two datasets. The OR of the *CEL* variants was generally low in the analysis of the WES dataset. The *CEL* gene harbors a region rich in insertion/deletion polymorphisms (Taylor et al., 1991), which may point to the possibility that this is a false positive finding but, nevertheless, the role of this gene in PD warrants further investigation.

## MPHOSPH10

M-phase phosphoprotein 10 (encoded as *MPHOSPH10*, MIM:605503), is involved in cell structural modifications during mitosis and is possibly a component of U3 snpRNP (Westendorf et al., 1998). Protein expression score is highest in brain tissue (Human proteome atlas (Uhlen et al., 2015)).

Three cases and one population control had rs143555311 variant in our study.

## ANKRD36

Ankyrin repeat domain 36 (encoded as *ANKRD36*) is most highly transcribed in testis and bone marrow (Human proteome atlas). In the brain it is transcribed mainly in cerebral cortex.

Four cases and one control had rs201600563 variant in our study.

## GPR126

G-protein-coupled receptor (encoded as *GPR126*, MIM: 616503) is involved in Schwann cells in myelination (Monk et al., 2009). Variants in the gene are associated to arthrogyrosis multiplex congenita (AMC) (Ravenscroft et al., 2015) which can overlap also with lethal congenital contracture syndrome 9, characterized by degeneration of anterior horn neurons, extreme skeletal muscle atrophy and congenital non-progressive joint contractures. Furthermore, *GPR126* has possible association to stature (MIM: 606255). Protein expression score is highest in the muscle, but relatively high also in the brain (Human proteome atlas).

Four cases had chr6:142758601 (human genome assembly 19) variant in our study. One case had familial PD.

## TAS2R19

Taste receptor, type 2, member 19 (encoded as *TAS2R19*, MIM: 613961) is one of the bitter taste receptors (Fischer et al., 2005). There is evidence of impairment of taste in PD (see e.g. (Cecchini et al., 2015)), although the results are still inconclusive. Six cases and five controls had rs12424373 variant in our study.

## SERPINA1

Serpin family A member 1 (encoded as *SERPINA1*, MIM: 107400) encodes a serine protease inhibitor protein, called alpha-1-antitrypsin (AAT) which is secreted outside the cell. Alpha 1-antitrypsin deficiency is suggested to be model for conformational diseases defined by aggregation of proteins due to abnormalities of various serpins (Carrell and Lomas, 2002). Alpha 1-antitrypsin inhibits transferrin binding to its receptor and is therefore involved in iron

metabolism (Graziadei et al., 1994). Alpha 1-antitrypsin allele PI\*M3 has been associated to Alzheimer's disease (Kowalska et al., 1996).

The minor allele frequency of the rs141620200 variant in *SERPINA1* was significantly greater in the cases than in the controls, with 28 cases and 3 controls harboring the thymine allele. Intriguingly, it was found only in cases that were sequenced together suggesting a possible false positive finding because of e.g. batch effect. Furthermore, the allele coding differs between discovery and replication datasets, so that in the replication dataset, the reference allele is adenosine and alternate allele cytosine, whereas in the discovery dataset the reference allele is cytosine and alternate thymine or adenosine. It is noteworthy that seven of the 28 cases with the variant allele had family history of PD.

### ZNF519

Not much is known about zinc finger protein 519 (encoded as *ZNF519*, NCBI gene: 162655). *ZNF519* has a KRAB domain and therefore the function may involve in transcriptional repression of euchromatic gene silencing (Schultz et al., 2002). Zinc finger genes that contain KRAB domain have been implicated to modulate retroelement transcription (Thomas and Schneider, 2011). In genetic studies, *ZNF519* has been previously implicated in ALS and autism (Cronin et al., 2009, Griswold et al., 2015).

Eleven cases and 10 population controls had rs61730995 variant. Age of PD onset was 35 years in one case.

### PABPC1

The SVA analysis of the WES data identified several PABPC1 variants with possible associations with PD (supplementary table S5). These PABPC1 variants had generally low effect on disease risk, with SVA test OR varying from 1.10 to 1.13.

The poly(A)-binding protein (encoded as PABP, MIM: 604679) binds to 3' end of eukaryotic mRNA and is involved in poly(A) shortening and translation initiation. Interestingly, *PABPC1* forms a complex with eukaryotic translation initiation factor 4-gamma (encoded as EIF4G1 MIM: 600495) (Tarun and Sachs, 1996), which have been suggested as a rare risk factor for PD (Huttenlocher et al., 2015). Furthermore, *PABPC1* is found in inclusions in amyotrophic lateral sclerosis patients (McGurk et al., 2014).

In our study, general mutation rate of the gene was estimated low by FLAG value. Quality value variant quality score log-odds in discovery dataset was relatively low in *PABPC1* variants, indicating possible false positive findings. Also the minor allele counts were rather high compared to allele frequencies in Exome aggregate consortium data of Finnish and European populations.

## SUPPLEMENTARY TABLES AND FIGURES

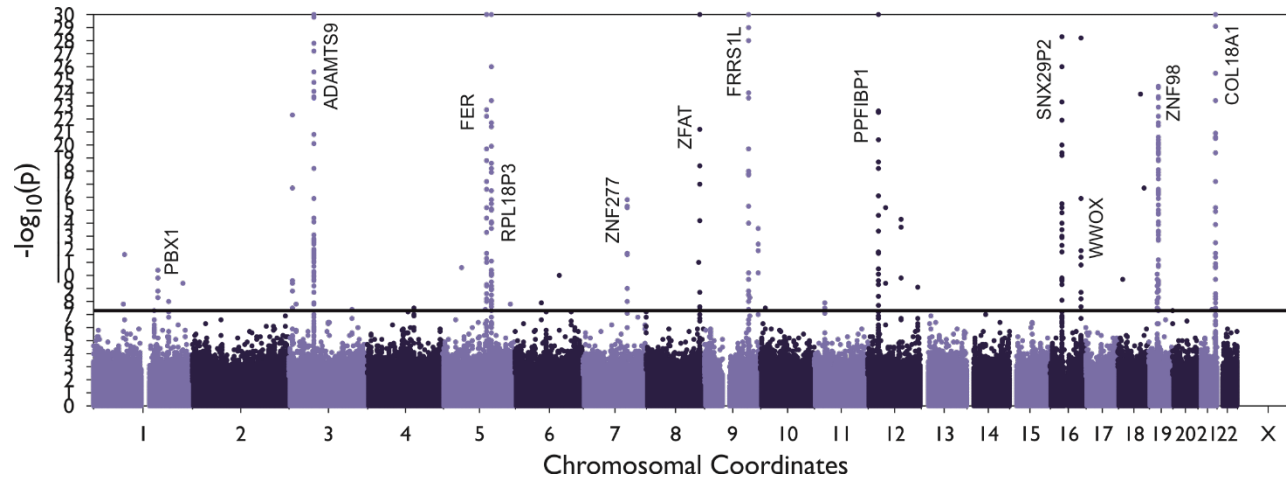

Figure S1 Manhattan plot of imputed GWAS single variant analysis. N=2053. Closest gene of the significant variants loci has been named with gene symbol.

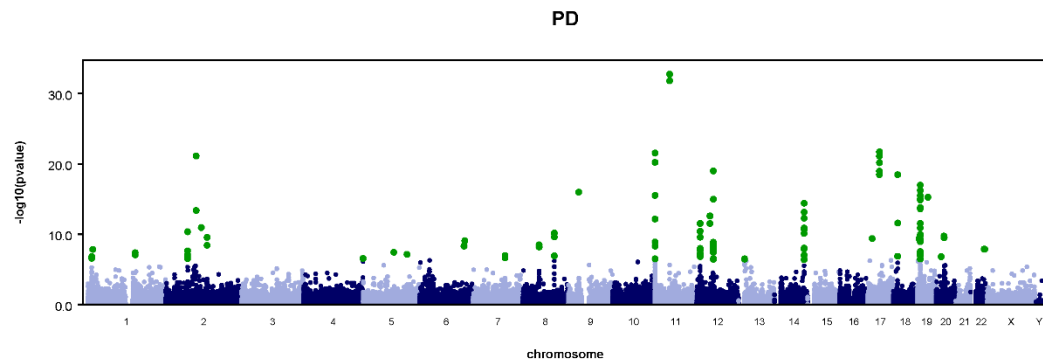

Figure S2 Manhattan plot for single variant associations in WES. Discovery dataset. Cases, N=185; Controls, N=480.

burden (maf<0.050)

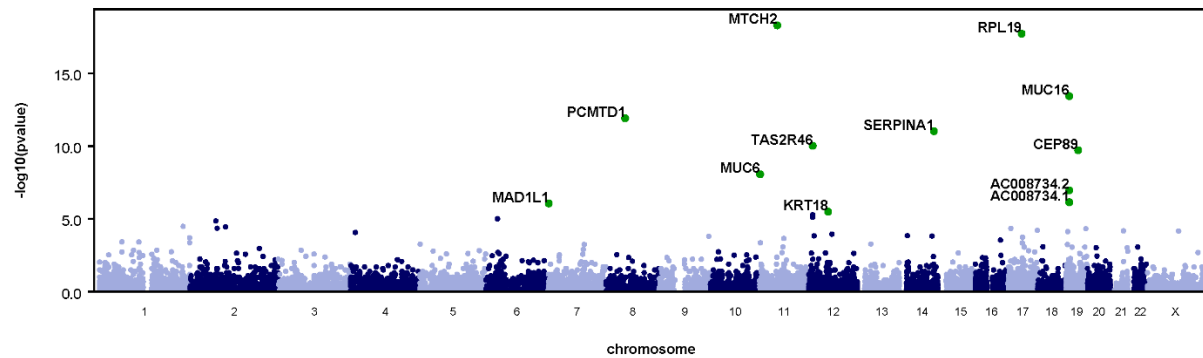

MB (maf<0.050)

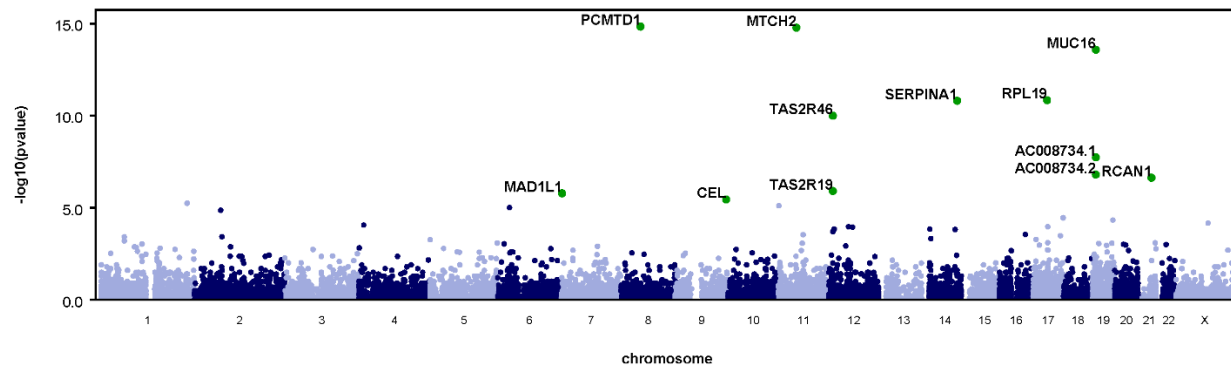

VT (maf<0.050)

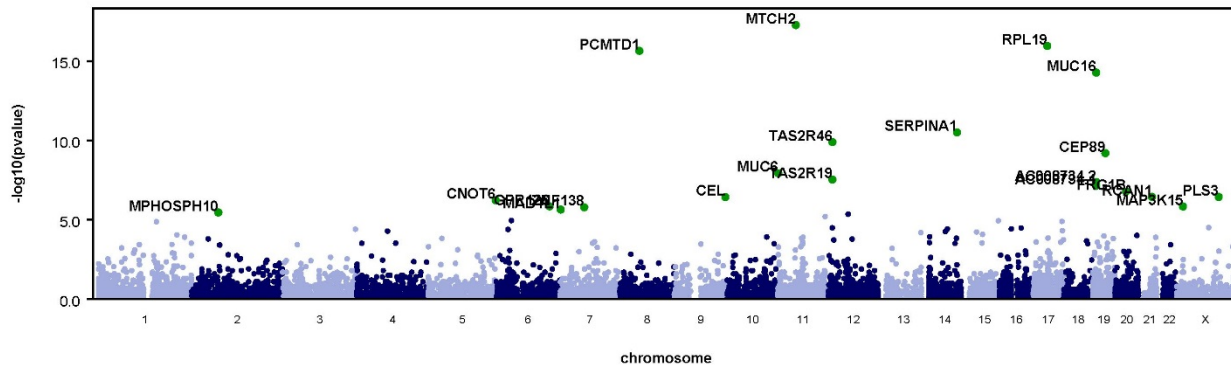



### SKAT (maf<0.050)

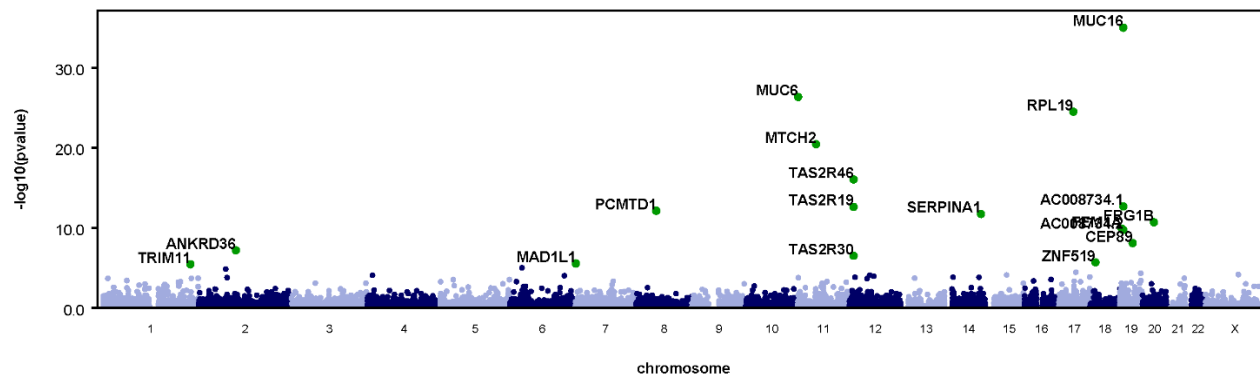

Figure S3 Manhattan plot for rare variant analysis in WES discovery dataset, using Burden, MB and SKAT tests with all variants with functional significance at MAF < 0.05.

Key: Burden, emmaxCMC test; SKAT, sequence kernel association test with SKAT-O; MB, Madsen-Browning weighted burden test; VT, variable threshold test.

Table S3 Genes within significant loci associated to PD in a recent meta-analysis.

| GENE             | TARGET REGION             | GENE           | TARGET REGION            |
|------------------|---------------------------|----------------|--------------------------|
| SIPA1L2          | chr1:231664611-233664611  | GBA/SYT11      | chr1:154135036-156135036 |
| CCDC62           | chr12:122303586-124303586 | FGF20          | chr8:15697091-17697091   |
| GCH1             | chr14:54348869-56348869   | ACMSD/TMEM163  | chr2:134539967-136539967 |
| BST1             | chr4:14737101-16737101    | FAM47E/SCARB2  | chr4:76198986-78198986   |
| INPP5F           | chr10:120536327-122536327 | LRRK2          | chr12:39614434-41614434  |
| SREBF/RAI1       | chr17:16715101-18715101   | DDRK1          | chr20:2168166-4168166    |
| RIT2             | chr18:39673380-41673380   | RAB7L1/NUCKS1  | chr1:204723572-206723572 |
| MCCC1            | chr3:181762437-183762437  | HLA-DQB1       | chr6:31666660-33666660   |
| BCKDK/STX1B      | chr16:30121793-32121793   | DLG2           | chr11:81916055-86588314  |
| STK39            | chr2:168110394-170110394  | ITGA8          | chr10:14305947-17012334  |
| MAPT             | chr17:42994648-44994648   | KRT8P25/APOOP2 | chr3:86072000-88030857   |
| GPNMB            | chr7:22293746-24293746    | MMP16          | chr8:87799459-90589717   |
| VPS13C           | chr15:60994134-62994134   | NMD3           | chr3:159689098-162219795 |
| MIR4697          | chr11:132765367-134765367 | SPPL2B         | chr19:1363321-3363321    |
| TMEM175/GAK/DGKQ | chr4:1948053-1951947      | TMEM229B       | chr14:66517653-68517653  |
| SNCA             | chr4:89626111-91626111    | USP25          | chr21:14542586-16542586  |

Target region =  $\pm$  1Mb area to search additional genes.

Table S4. Variants with the most significant p values in imputed GWAS study single variant analysis.

| CHROM | POS       | ALT | NS   | AC   | MAF     | CTRLCNT     | CASECNT    | CLOSEST_GENE | PVALUE    | OR    | CI          |
|-------|-----------|-----|------|------|---------|-------------|------------|--------------|-----------|-------|-------------|
| 21    | 46916033  | A   | 2053 | 371  | 0.09036 | 1604/46/0   | 144/193/66 | COL18A1      | 8.09E-240 | 1.719 | 1.673-1.768 |
| 3     | 64699445  | T   | 2053 | 2298 | 0.44033 | 243/782/625 | 176/188/39 | ADAMTS9-AS2  | 6.38E-44  | 1.78  | 1.707-1.857 |
| 12    | 27737074  | C   | 2053 | 2316 | 0.43595 | 392/817/441 | 24/141/238 | PPFIBP1      | 1.09E-33  | 1.4   | 1.359-1.442 |
| 16    | 29348809  | G   | 2053 | 1625 | 0.39576 | 702/724/224 | 0/353/50   | SNX29P2      | 4.35E-28  | 1.216 | 1.185-1.247 |
| 16    | 79360135  | A   | 2053 | 38   | 0.00925 | 1650/0/0    | 366/36/1   | WVOX         | 2.61E-27  | 0.852 | 0.834-0.871 |
| 8     | 135611154 | A   | 2053 | 550  | 0.13395 | 1399/245/6  | 157/199/47 | ZFAT         | 3.12E-96  | 1.152 | 1.127-1.177 |
| 19    | 22620820  | T   | 2053 | 479  | 0.11666 | 1203/423/24 | 396/6/1    | ZNF98        | 6.32E-25  | 1.213 | 1.176-1.253 |
| 7     | 111916329 | T   | 2053 | 54   | 0.01315 | 1630/20/0   | 370/32/1   | ZNF277       | 2.14E-16  | 1.151 | 1.123-1.179 |
| 5     | 108436958 | G   | 2053 | 193  | 0.047   | 1641/9/0    | 248/126/29 | FER          | 3.91E-133 | 1.945 | 1.734-2.182 |
| 5     | 120977240 | A   | 2053 | 3141 | 0.23502 | 122/690/838 | 0/31/372   | RPL18P3      | 2.51E-46  | 0.826 | 0.797-0.856 |
| 9     | 111929013 | T   | 2053 | 590  | 0.14369 | 1298/337/15 | 210/163/30 | FRRS1L       | 1.77E-31  | 1.517 | 1.375-1.673 |
| 1     | 164546863 | T   | 2053 | 116  | 0.02825 | 1589/59/2   | 351/51/1   | PBX1         | 1.49E-10  | 1.257 | 1.175-1.346 |
| 9     | 135955826 | G   | 2053 | 14   | 0.00341 | 1650/0/0    | 389/14/0   | CEL          | 1.19E-14  | 2.158 | 1.777-2.619 |

Cases, N=403; Controls, N=1650. Bonferroni multiple test correction cutoff value is 3,86E-09.

Key: CHR, chromosome; POS, Genome position (Grch37); ALT, Alternate allele; NS, number of samples; AC, minor allele count; AF, minor allele frequency; CTRLCNT & CASECNT, allele counts in controls and cases (respectively): reference/heterozygous alternate/homozygous alternate; CLOSEST\_GENE, gene which is closest to variant locus; PVALUE, P value in single variant analysis; OR, odds ratio; CI, confidence interval in OR.

Table S5 Characterization of variants significant in WES discovery dataset SVA analysis that are also found in replication dataset.

| GENE     | ID          | AF           | #Discovery dataset I |          |                |         |                |           |          |          |       |             |        | #Replication dataset II |     |
|----------|-------------|--------------|----------------------|----------|----------------|---------|----------------|-----------|----------|----------|-------|-------------|--------|-------------------------|-----|
|          |             |              | ExAC FIN             | ExAC All | RadialSVM_pred | LR_pred | ExonicFunction | Cases     | Controls | P_BONF   | OR    | CI          | AF     | AC                      | AN  |
| NMBR     | rs41289829  | 0.0057       | 0.0043               | 0.000873 | .              | .       | synonymous     | 0,6,6     | 0,3,3    | 8.02E-04 | 1.359 | 1.226-1.506 | 0.005  | 2                       | 400 |
| GPR126   | rs146727650 | 0.0057       | 0.0051               | 0.001011 | T              | T       | nonsynonymous  | 0,6,6     | 0,3,3    | 8.02E-04 | 1.359 | 1.226-1.506 | 0.005  | 2                       | 400 |
| PABPC1   | rs78146983  | 0.0882       | 0.0003               | 0.00042  | D              | D       | nonsynonymous  | 0,95,95   | 0,44,44  | 4.78E-09 | 1.131 | 1.096-1.167 | 0.0025 | 1                       | 398 |
| PABPC1   | rs113574896 | 0.0952       | 0.0023               | 0.002347 | T              | T       | nonsynonymous  | 0,99,99   | 0,51,51  | 4.66E-08 | 1.122 | 1.088-1.156 | 0.0051 | 2                       | 392 |
| PABPC1   | rs112868101 | 0.0945       | 0.0048               | 0.007026 | D              | D       | nonsynonymous  | 0,102,102 | 0,47,47  | 3.79E-05 | 1.103 | 1.07-1.136  | 0.0126 | 5                       | 396 |
| PABPC1   | rs78407297  | 0.1022       | 0.0043               | 0.008401 | T              | T       | nonsynonymous  | 0,106,106 | 0,55,55  | 1.72E-04 | 1.106 | 1.071-1.142 | 0.0102 | 4                       | 394 |
| PABPC1   | rs140835766 | 0.0844       | 0.1801               | 0.198    | D              | D       | nonsynonymous  | 0,90,90   | 0,43,43  | 1.28E-03 | 1.095 | 1.062-1.13  | 0.0026 | 1                       | 388 |
| PABPC1   | rs72681440  | 0.0869       | 0.2228               | 0.226    | T              | D       | nonsynonymous  | 0,88,88   | 0,49,49  | 1.33E-03 | 1.098 | 1.064-1.133 | 0.0077 | 3                       | 392 |
| SERPINA1 | rs141620200 | 0.019,0.0006 | 0.0026               | 0.002339 | T              | D       | nonsynonymous  | 0,28,28   | 0,3,3    | 1.49E-04 | 1.265 | 1.173-1.363 | 0.01   | 4                       | 400 |

Discovery dataset Cases, N=185, controls, N=480. Replication dataset Cases, N=200.

Key: Gene, gene symbol where variant is located; ID, variant rs-number; AF, minor allele frequency; ExAC FIN, Exome aggregate consortium allele frequency for Finnish population samples; ExAC All, Exome aggregate consortium allele frequency for all populations; RadialSVM\_pred, MetaSVM deleterious prediction score (Dong et al., 2015); LR\_pred, MetaLR deleterious prediction score (Dong et al., 2015); Cases, AC count Homozygous/Heterozygous/Total; Controls, AC count Homozygous/Heterozygous/Total; P\_Bonf, Bonferroni corrected P value; OR, estimated odds ratio for single variant; CI, Confidence interval for OR; AC, minor allele count; AN, Allele number.

Table S6 Top 20 variants in WES discovery and replication datasets not found from Finnish individuals in Exome Aggregation Consortium. Sorted by Odds ratio (OR).

| GENE     | ID         | REF | ALT | AF   | OR   | CI          | IMPACT   |
|----------|------------|-----|-----|------|------|-------------|----------|
| PAX8     | rs78802229 | T   | C   | 0.13 | 1.63 | 1.202-2.197 | modifier |
| TRPM6    | rs11144075 | C   | T   | 0.03 | 1.49 | 0.858-2.576 | modifier |
| ARPC5L   | rs876663   | A   | G   | 0.45 | 1.46 | 1.19-1.791  | modifier |
| NELFCD   | rs1043219  | C   | G   | 0.11 | 1.46 | 1.60-2.00   | modifier |
| SELL     | rs909628   | A   | G   | 0.09 | 1.45 | 1.021-2.058 | modifier |
| SLC12A2  | rs10089    | C   | T   | 0.27 | 1.44 | 1.138-1.82  | modifier |
| CCDC38   | rs17369927 | G   | A   | 0.24 | 1.35 | 1.066-1.716 | modifier |
| ATP6V1E1 | rs3532     | T   | C   | 0.23 | 1.33 | 1.043-1.695 | modifier |
| SMIM21   | rs11660753 | G   | A   | 0.56 | 1.33 | 1.087-1.624 | modifier |
| SCMH1    | rs11555079 | G   | A   | 0.26 | 1.31 | 1.039-1.661 | modifier |
| SH3BGRL3 | rs7544     | T   | G   | 0.25 | 1.30 | 1.025-1.648 | modifier |
| ATP6V1E1 | rs5746448  | A   | C   | 0.25 | 1.28 | 1.012-1.622 | modifier |
| UBXN11   | rs12090258 | C   | T   | 0.25 | 1.26 | 0.998-1.598 | modifier |
| SPOCK2   | rs3088251  | T   | C   | 0.13 | 1.25 | 0.934-1.687 | modifier |
| UGT2B4   | rs1966151  | A   | G   | 0.32 | 1.25 | 1.004-1.564 | modifier |
| AIM1L    | rs17163868 | C   | T   | 0.25 | 1.25 | 0.985-1.576 | modifier |
| .        | rs9524568  | T   | A   | 0.36 | 1.24 | 1.001-1.538 | .        |
| PIFO     | rs3738303  | G   | A   | 0.15 | 1.24 | 0.936-1.645 | modifier |
| AKR1B10  | rs2037004  | G   | A   | 0.59 | 1.24 | 1.017-1.505 | modifier |
| ZNF417   | rs10414704 | G   | T   | 0.41 | 1.23 | 0.998-1.514 | modifier |

Discovery dataset Cases, N=185, controls, N=480. Replication dataset Cases, N=200. In Minor allele frequency and odds ratio calculations cases from discovery and replication datasets are added together.

Key: Gene, gene symbol where variant is located; ID, variant rs-number; REF, reference allele; ALT, alternate allele; AF, minor allele frequency; OR, estimated odds ratio for single variant; CI, Confidence interval for OR; Impact, a subjective classification of the severity of the variant consequence; modifier, usually non-coding variants or variants affecting non-coding genes, where predictions are difficult or there is no evidence of impact.

Table S7 Burden, MB and SKAT test results in WES study. Using all nonsynonymous variants at MAF < 0.05

| ##METHOD=BURDEN                  |         |          |          |          |                 |          |          |          |
|----------------------------------|---------|----------|----------|----------|-----------------|----------|----------|----------|
| GENE                             | NUM_VAR | AVG_AF   | MIN_AF   | MAX_AF   | EFFECT_S<br>IZE | PVALUE   | P_BONF   | P_BH     |
| MTCH2                            | 7       | 0.017546 | 0.001504 | 0.036145 | 0.078561        | 7.76E-19 | 9.94E-15 | 9.94E-15 |
| RPL19                            | 9       | 0.025653 | 0.003759 | 0.048872 | 0.04494         | 9.55E-17 | 1.22E-12 | 6.12E-13 |
| MUC16                            | 176     | 0.011085 | 0.000752 | 0.043609 | 0.010882        | 7.57E-14 | 9.70E-10 | 2.79E-10 |
| PCMTD1                           | 11      | 0.020096 | 0.001504 | 0.048872 | 0.053275        | 8.71E-14 | 1.12E-09 | 2.79E-10 |
| SERPINA1                         | 13      | 0.01637  | 0.006767 | 0.026316 | 0.023175        | 9.23E-11 | 1.18E-06 | 2.36E-07 |
| CEP89                            | 5       | 0.014806 | 0.000752 | 0.049219 | -0.10159        | 2.32E-10 | 2.97E-06 | 4.95E-07 |
| TAS2R46                          | 18      | 0.013964 | 0.002262 | 0.034509 | 0.03013         | 1.00E-09 | 1.28E-05 | 1.83E-06 |
| MUC6                             | 99      | 0.012778 | 0.000752 | 0.048946 | 0.012889        | 3.77E-09 | 4.83E-05 | 6.04E-06 |
| AC008734.<br>2                   | 29      | 0.014133 | 0.001504 | 0.043609 | 0.01913         | 1.44E-07 | 0.00184  | 0.000204 |
| TAS2R19                          | 26      | 0.008126 | 0.001504 | 0.029323 | 0.022546        | 8.53E-07 | 0.010931 | 0.001093 |
| AC008734.<br>1                   | 44      | 0.011557 | 0.000752 | 0.029368 | 0.015441        | 9.94E-07 | 0.012733 | 0.001158 |
| MAD1L1                           | 2       | 0.004135 | 0.003008 | 0.005263 | -0.19106        | 1.14E-06 | 0.014559 | 0.001213 |
| KRT18                            | 5       | 0.025058 | 0.002259 | 0.048485 | 0.035783        | 2.21E-06 | 0.02826  | 0.002174 |
| MPHOSPH<br>10                    | 1       | 0.001504 | 0.001504 | 0.001504 | 0.465089        | 3.46E-06 | 0.044334 | 0.003167 |
| TAS2R30                          | 13      | 0.012608 | 0.002256 | 0.042857 | 0.037238        | 5.26E-06 | 0.067364 | 0.004491 |
| CPXCR1                           | 1       | 0.011278 | 0.011278 | 0.011278 | 0.11817         | 3.07E-05 | 0.393974 | 0.023981 |
| KDM6B                            | 7       | 0.007426 | 0.001504 | 0.018045 | -0.07127        | 3.18E-05 | 0.407678 | 0.023981 |
| RCAN1                            | 2       | 0.005639 | 0.000752 | 0.010526 | -0.151          | 3.90E-05 | 0.499893 | 0.027399 |
| STK19                            | 1       | 0.00458  | 0.00458  | 0.00458  | 0.239769        | 4.06E-05 | 0.520585 | 0.027399 |
| COG2                             | 2       | 0.012815 | 0.003759 | 0.02187  | 0.098783        | 6.17E-05 | 0.790162 | 0.039508 |
| ##METHOD=MB:<br>ADDITIONAL GENES |         |          |          |          |                 |          |          |          |
| GENE                             | NUM_VAR | AVG_AF   | MIN_AF   | MAX_AF   | EFFECT_S<br>IZE | PVALUE   | P_BONF   | P_BH     |
| CEL                              | 4       | 0.016354 | 0.000753 | 0.041353 | -0.00674        | 2.87E-06 | 0.036801 | 0.003067 |
| KRTAP4-7                         | 3       | 0.008779 | 0.002276 | 0.018045 | 0.009032        | 2.53E-05 | 0.323665 | 0.020229 |
| CNOT6                            | 2       | 0.00188  | 0.001504 | 0.002256 | -0.01131        | 3.16E-05 | 0.404368 | 0.022465 |
| FOXK2                            | 3       | 0.010395 | 0.001527 | 0.01579  | 0.007004        | 4.08E-05 | 0.522144 | 0.026107 |

**##METHOD=VT:  
ADDITIONAL GENES**

| GENE    | NUM_VAR | AVG_AF   | MIN_AF   | MAX_AF   | EFFECT_SIZE | MAF_CUT OFF | PVALUE   | P_BONF   |
|---------|---------|----------|----------|----------|-------------|-------------|----------|----------|
| FRG1B   | 16      | 0.004512 | 0.000752 | 0.012801 | 0.074994    | 0.012801    | 1.66E-07 | 0.002128 |
| PLS3    | 1       | 0.000752 | 0.000752 | 0.000752 | -0.73126    | 0.000752    | 3.61E-07 | 0.004625 |
| CEL     | 1       | 0.000753 | 0.000753 | 0.000753 | -0.73105    | 0.000753    | 3.68E-07 | 0.004719 |
| CNOT6   | 1       | 0.001504 | 0.001504 | 0.001504 | -0.5086     | 0.001504    | 5.90E-07 | 0.007561 |
| GPR126  | 3       | 0.002758 | 0.001504 | 0.005263 | 0.220807    | 0.005263    | 1.42E-06 | 0.018178 |
| MAP3K15 | 1       | 0.000752 | 0.000752 | 0.000752 | -0.73126    | 0.000752    | 1.44E-06 | 0.018486 |
| ZNF138  | 1       | 0.001504 | 0.001504 | 0.001504 | -0.51083    | 0.001504    | 1.61E-06 | 0.020589 |

**##METHOD=SKAT:  
ADDITIONAL GENES**

| GENE    | NUM_VAR | AVG_AF   | MIN_AF   | MAX_AF   | PVALUE_LIU | P_BONF   | P_BH     |
|---------|---------|----------|----------|----------|------------|----------|----------|
| FRG1B   | 27      | 0.013924 | 0.000752 | 0.045113 | 7.87E-12   | 1.01E-07 | 1.12E-08 |
| FEM1A   | 3       | 0.00604  | 0.003008 | 0.009848 | 6.81E-10   | 8.73E-06 | 7.28E-07 |
| ANKRD36 | 33      | 0.009255 | 0.000752 | 0.045113 | 5.94E-07   | 0.007605 | 0.000543 |
| ZNF519  | 4       | 0.006767 | 0.000752 | 0.010526 | 1.16E-06   | 0.014896 | 0.000931 |
| TRIM11  | 2       | 0.000752 | 0.000752 | 0.000752 | 3.86E-06   | 0.04951  | 0.002606 |

Total samples, N=665; Cases, N=185; Controls, N=480. Using all variants with functional significance at MAF < 0.05.

Key: NUM\_VAR, number of variants in the test. AVG\_AF, Average allele frequency (AF). MIN\_AF, Minimum AF. MAX\_AF, Maximum AF. EFFECT SIZE, Effect size of the test.

PVALUE & PVALUE\_LIU, P value of the test. P\_BONF, Bonferroni corrected p value. P\_BH, Benjamini & Hochberg corrected p value.

Table S8 Characterization of variants significant in WES discovery dataset in gene-based tests and found also in replication datasets.

| GENE      | CHR | POS       | ID          | AF            | #DISCOVERY DATASET I |          |      |      |         |          |                 |         |      |         |          | REPLICATION DATASET II |    |
|-----------|-----|-----------|-------------|---------------|----------------------|----------|------|------|---------|----------|-----------------|---------|------|---------|----------|------------------------|----|
|           |     |           |             |               | ExAC FIN             | ExAC All | AC   | AN   | Cases   | Controls | Exonic Function | VQSLOD  | FLAG | SISU_AF | SISU_Rep | AF                     | AC |
| MPHOSPH10 | 2   | 71361156  | rs143555311 | 1.21E-03      | 0.0012               | 0.002    | 2    | 1654 | 0,1,1   | 0,1,1    | nonsyn          | 2.84    | 48   | 0.0013  | -        | 0.005                  | 2  |
| ANKRD36   | 2   | 97858622  | rs201600563 | 1.21E-03      | 0.003                | 0.0014   | 2    | 1654 | 0,1,1   | 0,1,1    | nonsyn          | -6.042  | 24   | 0.0003  | SEG_DUPL | 0.0076                 | 3  |
| GPR126    | 6   | 142758601 | .           | 1.21E-03      | 0.0006               | 4.14E-05 | 2    | 1652 | 0,2,2   | 0,0,0    | nonsyn          | 1.77    | 82   | 0.0008  | -        | 0.005                  | 2  |
| TAS2R19   | 12  | 11174795  | rs12424373  | 4.23E-03      | 0.0048               | 0.05     | 7    | 1654 | 0,1,1   | 0,5,5    | nonsyn          | 0.532   | 28   | 0.0039  | SEG_DUPL | 0.0125                 | 5  |
| SERPINA1  | 14  | 94845944  | rs141620200 | 0.021,6.0e-04 | 0.0026               | 0.0023   | 31,1 | 1654 | 0,28,28 | 0,3,3    | nonsyn          | -0.7318 | 49   | 0.0019  | -        | 0.01                   | 4  |
| SERPINA1  | 14  | 94847262  | rs17580     | 7.86E-03      | 0.0089               | 0.02     | 13   | 1654 | 0,4,4   | 0,9,9    | nonsyn          | 3.62    | 49   | 0.0083  | -        | 0.0125                 | 5  |
| ZNF519    | 18  | 14105770  | rs61730995  | 0.012         | 0.0044               | 0.0051   | 20   | 1652 | 1,6,8   | 0,10,10  | nonsyn          | 3.01    | 42   | 0.0053  | SEG_DUPL | 0.01                   | 4  |

Discovery dataset Cases, N=185, controls, N=480. Replication dataset Cases, N=200.

Key: Gene, gene symbol where variant is located; Chr, chromosome; Pos, Genome position (Grch37); ID, variant RS-number; SISU AF, SISU project (Lim et al., 2014)

database allele frequencies; AF, minor allele frequency; AC, minor allele count; Cases, AC count Homozygous/Heterozygous/Total; Controls, AC count

Homozygous/Heterozygous/Total; SISU Rep, Indicates if variant locates in segmental duplication region. ExAC FIN, Exome aggregate consortium allele frequency for Finnish

population samples; ExAC All, Exome aggregate consortium allele frequency for all populations; FLAG, frequently mutated genes in public exomes -value: less is better; Get:

values from 1 to 2659 (19721 genes, value of 100th gene = 253). VQSLOD, variant quality score log-odds in discovery dataset: QC value from Variant quality score

recalibration in GATK.



Table S9 Variant count and burden test p values of the genes associated with PD, non-PD genes that may present with Parkinsonism and unconfirmed genes that may be associated with PD.

| GENE    | Snps | Rare_Snps | P_Burden | NonSyn_Snps | Rare_Nonsyn_snps | P_Burden_nonsyn |
|---------|------|-----------|----------|-------------|------------------|-----------------|
| ATP13A2 | 16   | 9         | 0.4508   | 5           | 3                | 0.6602          |
| ATXN2   | 5    | 5         | 0.642    | 3           | 3                | 0.4427          |
| ATXN3   | 9    | 4         | 0.3301   | 2           | 1                | 0.5498          |
| CSF1R   | 15   | 11        | 0.3355   | 6           | 6                | 0.574           |
| DNAJC6  | 10   | 5         | 0.453    | 3           | 2                | 0.04895         |
| EIF4G1  | 16   | 14        | 0.7365   | 6           | 5                | 0.9864          |
| FBXO7   | 7    | 3         | 0.7476   | 4           | 2                | 0.2935          |
| GBA     | 7    | 6         | 0.09467  | 4           | 5                | 0.2459          |
| GCH1    | 5    | 3         | 0.8744   | 1           | 0                | NA              |
| GIGYF2  | 14   | 9         | 0.6204   | 2           | 0                | NA              |
| GRN     | 4    | 4         | 0.06568  | 2           | 2                | 0.03456         |
| HTRA2   | 2    | 2         | 0.8221   | 1           | 1                | 0.786           |
| LRRK2   | 21   | 8         | 0.07878  | 12          | 7                | 0.05942         |
| MAPT    | 20   | 7         | 0.6435   | 7           | 2                | 0.8148          |
| PARK2   | 6    | 5         | 0.2825   | 6           | 5                | 0.2825          |
| PARK7   | 3    | 3         | 0.3488   | 1           | 1                | 0.9214          |
| PINK1   | 9    | 5         | 0.7337   | 6           | 4                | 0.695           |
| PLA2G6  | 9    | 9         | 0.675    | 2           | 2                | 0.9604          |
| POLG    | 15   | 14        | 0.1513   | 11          | 11               | 0.1785          |
| SPG11   | 16   | 15        | 0.04845  | 8           | 7                | 0.07389         |
| TH      | 2    | 1         | 0.3972   | 2           | 1                | 0.3972          |
| VPS35   | 3    | 3         | 0.1331   | 1           | 1                | 0.132           |

Key: GENE, gene symbol; Snps, Total variant count; Rare\_Snps, Minor allele frequency < 5%; NonSyn\_Snps, total nonsynonymous variants; Rare\_Nonsyn\_snps, rare nonsynonymous variants (MAF<5%); P\_Burden\_nonsyn, p value in burden test using nonsynonymous rare variants.

Table S10 Difference of variant counts and variant rates in WES discovery dataset in known PD genes.

| GENE    | HIGH | LOW | MODERATE | MODIFIER | Total variants | VariantRatio (MR <sup>case</sup> :MR <sup>control</sup> ) |
|---------|------|-----|----------|----------|----------------|-----------------------------------------------------------|
| ATP13A2 | 0    | -4  | 0        | 6        | 2              | 2.77353                                                   |
| ATXN2   | 0    | -1  | -1       | 2        | 0              | 2.5946                                                    |
| ATXN3   | 0    | 0   | 0        | 1        | 1              | 2.88288                                                   |
| CSF1R   | 0    | -5  | -1       | 6        | 0              | 2.5946                                                    |
| DNAJC6  | 0    | 1   | 1        | -2       | 0              | 2.5946                                                    |
| EIF4G1  | 0    | -3  | 0        | 1        | -2             | 2.40927                                                   |
| FBXO7   | 0    | -1  | -1       | 2        | 0              | 2.5946                                                    |
| GCH1    | 0    | 0   | 0        | 0        | 0              | 2.5946                                                    |
| GIGYF2  | 0    | -2  | 0        | 0        | -2             | 2.16216                                                   |
| GRN     | 0    | 1   | -1       | 1        | 1              | 3.24324                                                   |
| HTRA2   | 0    | 0   | 0        | 0        | 0              | 2.5946                                                    |
| LRRK2   | 0    | -2  | -1       | 2        | -1             | 2.50513                                                   |
| MAPT    | 0    | 0   | -1       | 1        | 0              | 2.5946                                                    |
| PARK2   | 0    | 0   | 0        | 0        | 0              | 2.5946                                                    |
| PARK7   | 0    | 0   | 1        | 0        | 1              | 3.89189                                                   |
| PINK1   | 0    | -1  | -1       | 0        | -2             | 2.33514                                                   |
| PLA2G6  | 0    | -2  | -1       | 3        | 0              | 2.5946                                                    |
| POLG    | 0    | 0   | -1       | 1        | 0              | 2.5946                                                    |
| SNCA    | 0    | 0   | 0        | 0        | 0              | 2.5946                                                    |
| SPG11   | 0    | -3  | 1        | 2        | 0              | 2.5946                                                    |
| SPR     | 0    | 0   | 0        | 0        | 0              | 2.5946                                                    |
| TH      | 0    | 0   | 0        | 0        | 0              | 2.5946                                                    |
| UCHL1   | 0    | 0   | 0        | 0        | 0              | 2.5946                                                    |
| VPS35   | 0    | 0   | -1       | 1        | 0              | 2.5946                                                    |

Variant counts are results of subtraction (SNPS<sup>cases</sup> – SNPS<sup>controls</sup>). Mean<sup>variantRatio</sup>=2.55669, SD<sup>variantRatio</sup>=(2.297319, 2.816061). Mean and SD are calculated using all genes in discovery dataset.

Key: HIGH,LOW,MODERATE,MODIFIER, variant counts in putative impact classes (see supplementary **table S11**);

Total variants, sum of all impact classes variant counts. Variant ratio, value defining variant ratio in cases vs controls (see methods).

Table S11 SNPEff putative impact classes.

| Putative Impact          | Sequence Ontology term                   |
|--------------------------|------------------------------------------|
| <b>HIGH</b>              | chromosome_number_variation              |
|                          | exon_loss_variant                        |
|                          | frameshift_variant                       |
|                          | rare_amino_acid_variant                  |
|                          | splice_acceptor_variant                  |
|                          | splice_donor_variant                     |
|                          | start_lost                               |
|                          | stop_gained                              |
|                          | stop_lost                                |
| <b>MODERATE</b>          | transcript_ablation                      |
|                          | 3_prime_UTR_truncation+exon_loss         |
|                          | 5_prime_UTR_truncation+exon_loss_variant |
|                          | coding_sequence_variant                  |
|                          | disruptive_inframe_deletion              |
|                          | disruptive_inframe_insertion             |
|                          | inframe_deletion                         |
|                          | inframe_insertion                        |
|                          | missense_variant                         |
|                          | regulatory_region_ablation               |
|                          | splice_region_variant                    |
|                          | TFBS_ablation                            |
|                          | <b>LOW</b>                               |
| start_codon_gain_variant |                                          |
| initiator_codon_variant  |                                          |
| splice_region_variant    |                                          |
| start_retained           |                                          |
| stop_retained_variant    |                                          |
| synonymous_variant       |                                          |
| <b>MODIFIER</b>          | 3_prime_UTR_variant                      |
|                          | 5_prime_UTR_variant                      |
|                          | coding_sequence_variant                  |
|                          | conserved_intergenic_variant             |

Table S12 Statistical post-hoc power of burden analysis in all variants in known PD genes.

| Gene    | post-hoc power |            |             |            |
|---------|----------------|------------|-------------|------------|
|         | all snps       |            | nonsyn snps |            |
|         | p=0.001        | p=1.00E-06 | p=0.001     | p=1.00E-06 |
| ATP13A2 | 0.592          | 0.11724    | 0.051       | 0.00071    |
| ATXN2   | 0.035          | 0.0004     | 0.031       | 0.0003     |
| ATXN3   | 0.004          | 1.98E-05   | 0.009       | 4.96E-05   |
| CSF1R   | 0.227          | 0.00962    | 0.144       | 0.0043     |
| DNAJC6  | 0.055          | 0.00071    | NA          | NA         |
| EIF4G1  | 0.544          | 0.08763    | 0.036       | 0.00048    |
| FBXO7   | 0.046          | 0.00063    | 0.033       | 0.00035    |
| GCH1    | 0.011          | 7.71E-05   | NA          | NA         |
| GIGYF2  | 0.113          | 0.00293    | NA          | NA         |
| GRN     | 0.076          | 0.00151    | NA          | NA         |
| LRRK2   | 0.096          | 0.00277    | 0.082       | 0.00205    |
| MAPT    | 0.068          | 0.00137    | 0.004       | 2.23E-05   |
| PARK7   | 0.074          | 0.00135    | NA          | NA         |
| PINK1   | 0.091          | 0.00194    | 0.091       | 0.00195    |
| PLA2G6  | 0.108          | 0.00285    | NA          | NA         |
| POLG    | 0.186          | 0.00778    | 0.085       | 0.00189    |
| SPG11   | 0.04           | 0.00049    | 0.002       | 1.50E-06   |
| VPS35   | 0.099          | 0.00211    | NA          | NA         |

WES discovery dataset. Calculated with either all snps or nonsynonymous snps. Significance levels are 0.001 and 1E-6.

Key: Gene, Gene symbol; all snps, all rare variants; nonsyn snps, nonsynonymous variants. NA, not enough nonsynonymous variants to calculate the power.

Table S13 CEL variants in WES discovery dataset.

| ID             | AF_Cases | AF_Controls | POS       | REF                                                                                                   | ALT | AF                | ExAC_FIN | ExAC_Freq | VQSLOD | AC  | AN   | ExonicFunction         |
|----------------|----------|-------------|-----------|-------------------------------------------------------------------------------------------------------|-----|-------------------|----------|-----------|--------|-----|------|------------------------|
| rs113056079    | 0.00225  | 0           | 135940439 | T                                                                                                     | G   | 0.000622          | 0        | 0.005015  | 3.87   | 1   | 1530 | nonsynon               |
| rs150358550    | 0.01778  | 0.00446     | 135940488 | C                                                                                                     | G   | 0.009102          | 0.0085   | 0.00444   | 3.88   | 13  | 1570 | synon                  |
| chr9:135940573 | 0.00222  | 0           | 135940573 | TAC                                                                                                   | T   | 0.000606          | .        | .         | -2.324 | 1   | 1572 | frameshift_deletion    |
| chr9:135941981 | 0        | 0.01421     | 135941981 | C                                                                                                     | CG  | 0.01              | 0        | 0.0000662 | 4.37   | 16  | 1576 | frameshift_insertion   |
| chr9:135942572 | 0        | 0           | 135942572 | T                                                                                                     | C   | 0.000605          | .        | .         | -3.867 | 0   | 1576 | nonsynon               |
| rs201255412    | 0.24215  | 0.27422     | 135944524 | C                                                                                                     | T   | 0.265             | 0.4323   | 0.165     | 4.31   | 408 | 1540 | synon                  |
| chr9:135944553 | 0        | 0.00091     | 135944553 | A                                                                                                     | T   | 0.001259          | 0.0053   | 8.88E-05  | 0.975  | 1   | 1512 | nonsynon               |
| rs200119384    | 0.2644   | 0.2278      | 135944586 | C                                                                                                     | T   | 0.24              | 0.4926   | 0.127     | 2.05   | 337 | 1418 | nonsynon               |
| rs201074543    | 0        | 0.01421     | 135945988 | A                                                                                                     | G   | 0.009662          | 0        | 0.002216  | -5.398 | 16  | 1576 | nonsynon               |
| rs201677850    | 0        | 0.01865     | 135945997 | C                                                                                                     | T   | 0.013             | 0        | 0.002282  | -5.788 | 21  | 1576 | nonsynon               |
| rs77696629     | 0.00444  | 0.0524      | 135946015 | T                                                                                                     | C   | 0.038             | 0.0043   | 0.019     | -3.78  | 61  | 1576 | nonsynon               |
| rs202171778    | 0.0067   | 0.00089     | 135946390 | G                                                                                                     | C,A | 0.001208,0.001208 | 0        | 0.002478  | -1.084 | 2,2 | 1576 | nonsynon               |
| chr9:135946507 | 0        | 0.00089     | 135946507 | C                                                                                                     | A   | 0.000605          | 0        | 5.79E-05  | 1.54   | 1   | 1574 | nonsynon               |
| rs488087       | 0.311    | 0.17557     | 135946599 | C                                                                                                     | T   | 0.225             | 0.4212   | 0.252     | 4.29   | 268 | 1204 | synon                  |
| chr9:135946921 | 0        | NA          | 135946921 | CCCCCCC<br>CCGTGCC<br>GCCACG<br>GGTGACT<br>CCGGCG                                                     | C   | 0.018             | 0.05     | 0.038     | 5.32   | 0   | 98   | nonframeshift_deletion |
| chr9:135946957 | 0.00463  | 0           | 135946957 | CCCCCG<br>TGCCGCC<br>CACGGGT<br>GACTCCG<br>GGGCCCC<br>CCCCGTG<br>ACCCCA<br>CGGGTGA<br>CTCCGAG<br>ACCG | C   | 0.003268          | 0        | 0.00079   | 4.57   | 1   | 274  | nonframeshift_deletion |
| chr9:135947001 | 0        | 0.00192     | 135947001 | CCCCACG<br>GGTGACT<br>CCGAGAC<br>CGCCCC<br>GTGCCG                                                     | C   | 0.001027          | 0.09     | 0.016     | 4.51   | 1   | 916  | nonframeshift_deletion |
| chr9:135947018 | 0.00495  | 0           | 135947018 | A                                                                                                     | G   | 0.001718          | 0        | 5.30E-05  | 0.77   | 2   | 1098 | nonsynon               |

|                |         |         |           |                                        |   |          |        |          |       |   |      |                         |
|----------------|---------|---------|-----------|----------------------------------------|---|----------|--------|----------|-------|---|------|-------------------------|
| chr9:135947020 | 0.00493 | 0       | 135947020 | A                                      | G | 0.001709 | 0      | 4.41E-05 | 0.115 | 2 | 1104 | nonsynon                |
| chr9:135947023 | 0.00246 | 0       | 135947023 | G                                      | C | 0.00084  | 0.0005 | 0.002629 | 1.51  | 1 | 1124 | nonsynon                |
| rs201133893    | 0       | 0.00209 | 135947051 | G                                      | A | 0.001385 | 0.0004 | 0.000151 | 2.18  | 2 | 1378 | nonsynon                |
| rs202034862    | 0       | 0.0021  | 135947053 | G                                      | A | 0.001391 | 0      | 1.68E-05 | 0.616 | 2 | 1372 | nonsynon                |
| chr9:135947055 | 0       | 0.00208 | 135947055 | CCCCCCT<br>GT                          | C | 0.001389 | 0      | 5.03E-05 | 2.98  | 2 | 1376 | frameshift_<br>deletion |
| chr9:135947069 | 0       | 0.00196 | 135947069 | CCACGGG<br>TGACTCT<br>GAGGCTG<br>CCCCT | C | 0.001319 | 0.0003 | 0.000108 | 3.79  | 2 | 1444 | frameshift_<br>deletion |
| rs200257295    | 0       | 0.00185 | 135947100 | C                                      | G | 0.001267 | 0.0003 | 0.000124 | 0.471 | 2 | 1504 | synon                   |

Cases, N=185; Controls, N=480.

Key: ID, variant RS-number; AF\_Cases, minor allele frequency in cases; AF\_Controls, minor allele frequency in controls; POS, Genome position (Grch37); REF, reference allele; ALT, alternate allele; AF, minor allele frequency; ExAC FIN, Exome aggregate consortium allele frequency for Finnish population samples; ExAC Freq, Exome aggregate consortium allele frequency for all populations; AC, minor allele count; AN, Allele number; VQSLOD, variant quality score log-odds in discovery dataset: QC value from Variant quality score recalibration in GATK; Exonic Function, Functional effects caused by variant; nonsyn, nonsynonymous; synon, synonymous.

Table S14 *CEL* variants in WES replication dataset.

| ID             | POS       | REF | ALT | AF        | ExAC_FIN | ExAC_Freq | AC | AN  | ExonicFunction |
|----------------|-----------|-----|-----|-----------|----------|-----------|----|-----|----------------|
| rs113056079    | 135940439 | T   | G   | 0         | 0        | 0.005015  | 0  | 400 | nonsynonymous  |
| rs150358550    | 135940488 | C   | G   | 0.0075    | 0.0085   | 0.00444   | 3  | 400 | synonymous     |
| chr9:135942035 | 135942035 | C   | T   | 0.0025    | 0.0005   | 0.0009177 | 1  | 400 | synonymous     |
| rs77696629     | 135946015 | T   | C   | 0.0025    | 0.0043   | 0.019     | 1  | 400 | nonsynonymous  |
| chr9:135946507 | 135946507 | C   | A   | 0.0025    | 0        | 5.79E-05  | 1  | 400 | nonsynonymous  |
| rs78256304     | 135946548 | C   | G   | 0         | 0        | 0.002525  | 0  | 400 | synonymous     |
| chr9:135946578 | 135946578 | A   | G   | 0         | 0.001    | 0.0008705 | 0  | 400 | synonymous     |
| chr9:135946581 | 135946581 | G   | T   | 0         | 0.001    | 0.0008707 | 0  | 400 | synonymous     |
| chr9:135946605 | 135946605 | C   | G   | 0         | 0.0017   | 0.0009902 | 0  | 400 | synonymous     |
| chr9:135946690 | 135946690 | G   | C   | 0.0075    | .        | 0.036     | 3  | 400 | nonsynonymous  |
| chr9:135946953 | 135946953 | C   | G   | 0         | 0        | 0.001013  | 0  | 392 | synonymous     |
| chr9:135946954 | 135946954 | G   | C   | 0         | .        | .         | 0  | 394 | nonsynonymous  |
| chr9:135946995 | 135946995 | C   | T   | 0.0075377 | 0.0101   | 0.006498  | 3  | 398 | synonymous     |
| chr9:135947032 | 135947032 | C   | A   | 0.0025381 | 0        | 1.74E-05  | 1  | 394 | nonsynonymous  |
| chr9:135947034 | 135947034 | G   | C   | 0.0100503 | 0        | 0.0006173 | 4  | 398 | synonymous     |
| chr9:135947061 | 135947061 | T   | C   | 0.0025    | 0.0002   | 0.0001424 | 1  | 400 | synonymous     |

ID, variant RS-number; POS, Genome position (Grch37); REF, reference allele; ALT, alternate allele; AF, minor allele frequency; ExAC FIN, Exome aggregate consortium allele frequency for Finnish population samples; ExAC Freq, Exome aggregate consortium allele frequency for all populations; AC, minor allele count; AN, Allele number; Exonic Function, Functional effects caused by variant.

Table S15 Genes closest to significant loci in GWAS analysis of the Finnish PD cohort.

|                |                |                |                 |
|----------------|----------------|----------------|-----------------|
| FER            | GON4L          | EYS            | chr12:126370875 |
| COL18A1        | PBX1           | IRAK1BP1       | TMEM117         |
| ZFAT           | chr1:189532844 | ZNF277         | chr12:84430416  |
| chr3:64702684  | chr1:226204970 | chr8:132177139 | chr16:79355947  |
| chr5:120977240 | chr3:20432637  | chr8:135477079 | chr18:11450936  |
| PPFIBP1        | SRGAP3         | chr9:114064016 | LOC643542       |
| FRRS1L         | chr4:117161575 | CEL            | chr19:22510418  |
| SNX29P2        | KCNIP1         | RALGDS         | chr19:22660286  |
| ZNF98          | chr6:113278451 | chr10:14376577 | chr20:699763    |
| ALPK2          | chr6:142312266 | ANO3           | LOC101928269    |



Table S16 Imputed GWAS study, gene-set analysis top hits with Burden test.

| ##Method=Burden |     |           |           |             |              |          |          |          |      |             |
|-----------------|-----|-----------|-----------|-------------|--------------|----------|----------|----------|------|-------------|
| GENE            | CHR | BEG       | END       | TOT_MARKERS | PASS_MARKERS | PVALUE   | P_BONF   | P_BH     | OR   | CI          |
| CELP            | 9   | 135961850 | 135961851 | 2           | 2            | 2.14E-13 | 3.11E-09 | 3.11E-09 | 2.14 | 1.747-2.614 |
| TPTE2P6         | 13  | 25144872  | 25171521  | 3           | 1            | 1.66E-06 | 0.024    | 0.012    | 2.08 | 1.542-2.801 |
| RAB11FIP2       | 10  | 119774577 | 119774598 | 2           | 2            | 4.35E-06 | 0.063    | 0.021    | 1.22 | 1.121-1.327 |
| OR10G2          | 14  | 22102317  | 22102842  | 6           | 1            | 1.43E-05 | 0.207    | 0.052    | 1.77 | 1.368-2.287 |
| GBA             | 1   | 155205043 | 155210498 | 3           | 3            | 3.27E-05 | 0.474    | 0.083    | 1.12 | 1.059-1.174 |
| KRTAP10-7       | 21  | 46020720  | 46021546  | 10          | 5            | 3.44E-05 | 0.500    | 0.083    | 1.11 | 1.058-1.171 |
| CTC-360P9.3     | 19  | 32528454  | 32528454  | 1           | 1            | 1.35E-04 | 1        | 0.279    | 2.04 | 1.416-2.94  |
| CYP4F8          | 19  | 15730502  | 15739661  | 2           | 1            | 1.72E-04 | 1        | 0.311    | 1.65 | 1.271-2.141 |
| COMMD5          | 8   | 146076611 | 146076708 | 2           | 1            | 4.35E-04 | 1        | 0.619    | 1.55 | 1.214-1.977 |
| RP11-368J21.2   | 16  | 22546193  | 22546193  | 1           | 1            | 4.48E-04 | 1        | 0.619    | 2.15 | 1.404-3.304 |

Cases, N=403; Controls, N=1650.

Key: GENE, gene symbol of the closest gene in the variant loci; CHR, chromosome; BEG & END, Gene genome position (Grch37) beginning and end; TOT\_MARKERS, total number of variants; PASS\_MARKERS, variants that pass the filters; PVALUE, P value in burden variant analysis; P\_BONF, Bonferroni corrected p value; P\_BH, Benjamini & Hochberg corrected p value; OR, odds ratio; CI, confidence interval in OR.

Table S17 Imputed GWAS study, gene-set analysis top hits with SKAT test.

| ##Method=SKAT |     |           |           |              |               |               |          |          |          |
|---------------|-----|-----------|-----------|--------------|---------------|---------------|----------|----------|----------|
| GENE          | CHR | BEGIN     | END       | NUM_ALL_VARS | NUM_PASS_VARS | NUM_SING_VARS | PVALUE   | P_BONF   | P_BH     |
| CELP          | 9   | 135961850 | 135961851 | 2            | 2             | 0             | 1.49E-11 | 2.16E-07 | 2.16E-07 |
| COL18A1       | 21  | 46875586  | 46930147  | 22           | 18            | 2             | 3.66E-06 | 0.05312  | 0.02656  |
| PTPN13        | 4   | 87610798  | 87724970  | 8            | 6             | 0             | 5.54E-06 | 0.080338 | 0.026779 |
| OR10G2        | 14  | 22102317  | 22102842  | 6            | 1             | 0             | 1.07E-05 | 0.155387 | 0.038847 |
| COX19         | 7   | 1015109   | 1015110   | 2            | 2             | 2             | 1.62E-05 | 0.234416 | 0.046883 |
| TRIM32        | 9   | 119460579 | 119460579 | 1            | 1             | 0             | 2.61E-05 | 0.379019 | 0.06317  |
| CYP4F8        | 19  | 15730502  | 15739661  | 2            | 1             | 0             | 3.16E-05 | 0.45915  | 0.065593 |
| NETO1         | 18  | 70417396  | 70532471  | 3            | 2             | 0             | 4.66E-05 | 0.676019 | 0.072132 |
| ANO3          | 11  | 26463582  | 26558947  | 2            | 2             | 0             | 4.90E-05 | 0.711868 | 0.072132 |
| RAB11FIP2     | 10  | 119774577 | 119774598 | 2            | 2             | 0             | 4.97E-05 | 0.721317 | 0.072132 |
| TPTE2P6       | 13  | 25144872  | 25171521  | 3            | 1             | 0             | 7.42E-05 | 1        | 0.097851 |
| TEAD4         | 12  | 3131189   | 3147203   | 2            | 2             | 0             | 0.000111 | 1        | 0.134593 |
| PRAMEF2       | 1   | 12918946  | 12921581  | 14           | 12            | 1             | 0.000133 | 1        | 0.135938 |
| KRTAP10-7     | 21  | 46020720  | 46021546  | 10           | 5             | 1             | 0.000134 | 1        | 0.135938 |
| GBA           | 1   | 155205043 | 155210498 | 3            | 3             | 0             | 0.00014  | 1        | 0.135938 |

Cases, N=403; Controls, N=1650.

Key: GENE, gene symbol of the closest gene in the variant loci; CHR, chromosome; BEG & END, Gene genome position (Grch37) beginning and end; NUM\_ALL\_VARS, Number of all variants in gene locus; NUM\_PASS\_VARS, Variants that pass the filters; NUM\_SING\_VARS, Number of singleton variants; PVALUE, P value in burden variant analysis; P\_BONF, Bonferroni corrected p value; P\_BH, Benjamini & Hochberg corrected p value.

Table S18 Ten most significant p values in WES discovery dataset near (+/-1 Mbp) of the known PD risk loci.

| MARKER_ID | TOT_MARKERS | PASS_MARKERS | P VALUE   | FDR(BH)     | Bonferroni |
|-----------|-------------|--------------|-----------|-------------|------------|
| PPAPDC1A  | 3           | 1            | 0.0001064 | 0.0518168   | 0.0518168  |
| STK19     | 2           | 2            | 0.0003437 | 0.08369095  | 0.1673819  |
| HSPA1B    | 5           | 5            | 0.0007906 | 0.128340733 | 0.3850222  |
| SPPL2C    | 22          | 8            | 0.001274  | 0.1551095   | 0.620438   |
| PPT2      | 3           | 3            | 0.001898  | 0.1848652   | 0.924326   |
| CORO1A    | 4           | 3            | 0.005918  | 0.480344333 | 1          |
| MPHOSPH9  | 10          | 7            | 0.01132   | 0.689105    | 1          |
| ZNF768    | 5           | 3            | 0.01054   | 0.689105    | 1          |
| ACBD4     | 2           | 1            | 0.02869   | 0.85042375  | 1          |

Burden analysis with EMMAX test, using all the rare variants in target regions.

Key: TOT\_MARKERS, total number of variants; PASS\_MARKERS, variants that pass the filters; P VALUE, p value of the test; FDR(BH), Benjamini & Hochberg corrected p value; Bonferroni, Bonferroni corrected p value.

Table S19 Variant count and call rate in WES discovery dataset.

| Gene     | Snps | Rare_Snps | NonSyn_Snps | Rare_Nonsyn_snps | Callrate |
|----------|------|-----------|-------------|------------------|----------|
| ACMSD    | 1    | 1         | 1           | 1                | 1        |
| BST1     | 7    | 5         | 4           | 3                | 0.989474 |
| CCDC62   | 7    | 4         | 4           | 1                | 1        |
| DDRGK1   | 4    | 2         | 2           | 0                | 1        |
| FAM47E   | 9    | 5         | 7           | 4                | 0.998663 |
| GAK      | 16   | 13        | 8           | 7                | 0.996335 |
| GBA      | 7    | 6         | 4           | 3                | 0.996348 |
| GCH1     | 5    | 3         | 1           | 0                | 0.992782 |
| GPNMB    | 12   | 8         | 6           | 5                | 0.999749 |
| HLA-DQB1 | 68   | 15        | 32          | 8                | 0.993764 |
| INPP5F   | 9    | 7         | 3           | 2                | 1        |
| LRRK2    | 21   | 8         | 12          | 7                | 0.99957  |
| MAPT     | 20   | 7         | 7           | 2                | 0.996917 |
| MCCC1    | 6    | 4         | 2           | 1                | 0.999499 |
| RIT2     | 7    | 5         | 1           | 1                | 0.998067 |
| SCARB2   | 6    | 6         | 1           | 1                | 0.992732 |
| SIPA1L2  | 26   | 16        | 11          | 8                | 0.998554 |
| STK39    | 2    | 2         | 1           | 1                | 1        |
| SYT11    | 3    | 2         | 1           | 1                | 0.99599  |
| TMEM175  | 4    | 2         | 2           | 1                | 1        |
| VPS13C   | 32   | 26        | 19          | 15               | 0.999436 |

Selected genes are near loci with significant p values in meta-analysis.

Key: Gene, gene symbol; Snps, Total variant count; Rare\_Snps, Minor allele frequency < 5%; NonSyn\_Snps, total nonsynonymous variants; Rare\_Nonsyn\_snps, rare nonsynonymous variants (MAF<5%); Callrate, total variant missingness by call rate.

Table S20 Quality control values (GATK) of the WES discovery dataset top hits that were found also in replication dataset.

| #CHROM | POS       | ID          | REF | ALT | GENE      | BaseQ RankSum | Clipping RankSum | DP    | FS     | GQ_MEAN | GQ_STDDEV | Inbreeding Coeff | MLEAC | MLEAF           | MQ    | MQ0 | MQ RankSum | NCC | QD    | ReadPos RankSum | SOR   | VQSLD   | culprit |
|--------|-----------|-------------|-----|-----|-----------|---------------|------------------|-------|--------|---------|-----------|------------------|-------|-----------------|-------|-----|------------|-----|-------|-----------------|-------|---------|---------|
| 2      | 71361156  | rs143555311 | C   | G   | MPHOSPH10 | 0.75          | 0.165            | 20171 | 3.785  | 68.14   | 149.75    | -0.0016          | 2     | 1.21E-03        | 60    | 0   | 0.92       | 1   | 13.53 | 1.9             | 0.518 | 2.84    | DP      |
| 2      | 97858622  | rs201600563 | C   | A   | ANKRD36   | 1.69          | 0.616            | 20554 | 45.101 | 62.16   | 12.01     | -0.0018          | 2     | 1.21E-03        | 56.49 | 0   | -2.9       | 1   | 1.02  | 1.31            | 7.275 | -6.042  | FS      |
| 6      | 142758601 | .           | T   | G   | GPR126    | 0.801         | 1.19             | 18767 | 3.21   | 62.19   | 23.84     | -0.0039          | 2     | 1.21E-03        | 60    | 0   | 1          | 2   | 12.89 | -0.607          | 1.06  | 1.77    | DP      |
| 12     | 11174795  | rs12424373  | T   | G   | TAS2R19   | 7.45          | 0.068            | 77378 | 1.139  | 117.33  | 277.97    | -0.0043          | 7     | 4.23E-03        | 59.33 | 0   | 1.91       | 1   | 14.84 | 1.03            | 0.58  | 0.532   | MQRan   |
| 14     | 94845944  | rs141620200 | C   | T,A | SERPINA1  | -1.936        | -0.156           | 19857 | 13.079 | 62.67   | 85.19     | 0.3235           | 30,1  | 0.021,6.046e-04 | 59.51 | 0   | -0.49      | 1   | 7.61  | -0.12           | 1.834 | -0.7318 | FS      |
| 14     | 94847262  | rs17580     | T   | A   | SERPINA1  | -1.79         | 0.094            | 19885 | 3.25   | 77.45   | 139.66    | -0.0082          | 13    | 7.86E-03        | 60    | 0   | -0.053     | 1   | 13.63 | 1.45            | 0.914 | 3.62    | DP      |
| 18     | 14105770  | rs61730995  | T   | C   | ZNF519    | 3.04          | 0.248            | 33735 | 0      | 103.18  | 251.6     | 0.0864           | 20    | 0.012           | 60    | 0   | -0.128     | 2   | 14.78 | 1.94            | 0.658 | 3.01    | FS      |

Table S21 Quality control values (GATK) of WES discovery dataset variants that were used in Gene-based analysis.

| #CHROM | POS      | AC | AN   | Cases   | Controls | ExonicFunc.refGene | refGene   | BaseQRankSum | ClippingRankSum | DP     | FS     | GQ_MEAN | GQ_STDDEV | Inbreeding Coeff | MLEAC | MLEAF    | MQ    | MQ0 | MQRankSum | NCC | QD    | ReadPosRankSum | SOR   | VQSLD | culprit |    |
|--------|----------|----|------|---------|----------|--------------------|-----------|--------------|-----------------|--------|--------|---------|-----------|------------------|-------|----------|-------|-----|-----------|-----|-------|----------------|-------|-------|---------|----|
| 2      | 71361156 | 2  | 1654 | 0,1,1   | 0,1,1    | nonsyn             | MPHOSPH10 | 0.75         | 0.165           | 20171  | 3.785  | 68.14   | 149.75    | -0.0016          | 2     | 1.21E-03 | 60    | 0   | 0.92      | 1   | 13.53 | 1.9            | 0.518 | 2.84  | DP      |    |
| 2      | 97779601 | 8  | 1654 | 0,0,0   | 0,7,7    | nonsyn             | ANKRD36   | -1.396       | -0.195          | 21213  | 62.846 | 61.29   | 12.85     | -0.0054          | 6     | 3.63E-03 | 57.25 | 0   | -2.757    | 1   | 0.37  | 0.301          | 6.273 | -     | 8.954   | FS |
| 2      | 97779619 | 3  | 1654 | 0,0,0   | 0,3,3    | nonsyn             | ANKRD36   | -2.526       | -0.601          | 20212  | 0      | 62.29   | 29.8      | -0.0022          | 3     | 1.81E-03 | 56.93 | 0   | 0.33      | 1   | 11.21 | 0.2            | 0.67  | 3.4   | FS      |    |
| 2      | 97784177 | 4  | 1654 | 0,2,2   | 0,2,2    | nonsyn             | ANKRD36   | 2.42         | -0.099          | 20575  | 1.125  | 67.94   | 63.02     | -0.0043          | 4     | 2.42E-03 | 54.68 | 0   | 0.566     | 1   | 13.77 | 0.748          | 0.598 | 2.79  | DP      |    |
| 2      | 97792829 | 2  | 1654 | 0,1,1   | 0,1,1    | nonsyn             | ANKRD36   | 3.11         | -1              | 18702  | 17.532 | 61.85   | 9.83      | -0.0014          | 2     | 1.21E-03 | 51.75 | 0   | 0.244     | 1   | 7.23  | 1.11           | 4.235 | -     | 1.427   | FS |
| 2      | 97808524 | 80 | 1654 | 0,57,57 | 0,16,16  | nonsyn             | ANKRD36   | 1.19         | 0.159           | 41646  | 21.099 | 89.79   | 84.18     | -0.0545          | 78    | 0.047    | 58.6  | 0   | -3.635    | 1   | 2.99  | -2.261         | 5.435 | -     | 5.549   | QD |
| 2      | 97808562 | 9  | 1654 | 0,8,8   | 0,0,0    | nonsyn             | ANKRD36   | 2.86         | -0.079          | 32269  | 6.486  | 74.15   | 26.32     | -0.0084          | 7     | 4.23E-03 | 54.33 | 0   | -2.898    | 1   | 0.73  | 0.031          | 1.781 | -     | 3.361   | QD |
| 2      | 97812240 | 2  | 1656 | 0,1,1   | 0,1,1    | nonsyn             | ANKRD36   | 0.278        | 0.896           | 22626  | 66.534 | 67.48   | 24.04     | -0.0017          | 2     | 1.21E-03 | 53.35 | 0   | -1.246    | 0   | 2.73  | -0.597         | 4.231 | -     | 10.32   | FS |
| 2      | 97812249 | 2  | 1656 | 0,1,1   | 0,1,1    | nonsyn             | ANKRD36   | 5.05         | 1.2             | 22507  | 57.555 | 66.39   | 16.52     | -0.0014          | 2     | 1.21E-03 | 54.6  | 0   | -1.683    | 0   | 0.85  | -1.203         | 6.184 | -     | 8.875   | FS |
| 2      | 97817670 | 69 | 1656 | 0,25,25 | 0,40,40  | nonsyn             | ANKRD36   | 1.79         | 0.012           | 142344 | 2.745  | 96.87   | 75.88     | -0.0554          | 70    | 0.042    | 52.54 | 0   | -3.613    | 0   | 1.51  | -3.119         | 1.418 | -     | 7.829   | QD |
| 2      | 97818249 | 4  | 1648 | 0,2,2   | 0,2,2    | nonsyn             | ANKRD36   | 2.52         | 0.245           | 16109  | 53.737 | 108.77  | 57.47     | -0.003           | 4     | 2.43E-03 | 37.42 | 0   | 3.11      | 4   | 3.61  | 1.06           | 2.127 | -     | 5.109   | FS |
| 2      | 97820422 | 7  | 1624 | 0,1,1   | 0,6,6    | nonsyn             | ANKRD36   | 0.318        | -0.151          | 120383 | 1.767  | 88.98   | 39.53     | -0.0137          | 3     | 1.85E-03 | 40.41 | 0   | -0.635    | 16  | 0.88  | -0.387         | 1.761 | -     | 2.527   | QD |
| 2      | 97823853 | 11 | 1654 | 0,3,3   | 0,8,8    | nonsyn             | ANKRD36   | -1.123       | 0.463           | 22992  | 0      | 98      | 397.19    | -0.0074          | 11    | 6.65E-03 | 59.21 | 0   | 0.771     | 1   | 13.63 | 0.279          | 0.727 | 3.26  | FS      |    |
| 2      | 97823903 | 34 | 1654 | 0,32,32 | 0,0,0    | nonsyn             | ANKRD36   | 3.17         | 0.137           | 22402  | 36.784 | 58.11   | 22.41     | -0.0341          | 29    | 0.018    | 56.51 | 0   | -2.784    | 1   | 0.74  | 1.32           | 5.134 | -     | 3.211   | FS |
| 2      | 97827852 | 23 | 1656 | 0,7,7   | 0,16,16  | nonsyn             | ANKRD36   | -1.505       | -0.105          | 68813  | 1.596  | 101.49  | 32.35     | -0.0155          | 21    | 0.013    | 44.84 | 0   | 0.067     | 0   | 0.88  | -0.043         | 0.991 | -     | 2.214   | QD |
| 2      | 97830031 | 8  | 1652 | 0,5,5   | 0,3,3    | stopgain           | ANKRD36   | -2.812       | 0.014           | 150652 | 0      | 104.58  | 29.38     | -0.0062          | 4     | 2.42E-03 | 31.22 | 0   | -1.472    | 2   | 0.13  | 0.502          | 1.006 | -     | 2.461   | DP |

|   |          |    |    |         |         |        |        |        |        |      |      |        |        |         |    |          |       |   |        |   |       |        |     |       |                |
|---|----------|----|----|---------|---------|--------|--------|--------|--------|------|------|--------|--------|---------|----|----------|-------|---|--------|---|-------|--------|-----|-------|----------------|
| 2 | 9783017  | 27 | 16 | 0,19,19 | 0,7,7   | nonsyn | ANKRD3 | -2.133 | 0.197  | 1346 | 0    | 104.86 | 31.32  | -0.018  | 21 | 0.013    | 52.61 | 0 | -3.766 | 1 | 0.6   | -0.973 | 0.7 | -     | MQRankSum      |
| 2 | 9784748  | 13 | 16 | 0,5,5   | 0,8,8   | nonsyn | ANKRD3 | 0.255  | -0.162 | 2345 | 0    | 91.98  | 244.97 | -0.0079 | 13 | 7.86E-03 | 44.31 | 0 | -0.773 | 1 | 12.96 | 1.24   | 0.6 | 3.807 | m              |
| 2 | 9784931  | 3  | 16 | 0,1,1   | 0,2,2   | nonsyn | ANKRD3 | -0.659 | 0.103  | 2584 | 0    | 75.2   | 150.36 | -0.002  | 3  | 1.81E-03 | 55.24 | 0 | 1.23   | 0 | 13.34 | 0.373  | 0.6 | 2.66  | FS             |
| 2 | 9785120  | 46 | 16 | 0,35,35 | 0,7,7   | nonsyn | ANKRD3 | -1.274 | -0.056 | 1244 | 27.0 | 67.43  | 62.27  | -0.1    | 53 | 0.032    | 45.8  | 0 | -3.859 | 1 | 1.0   | -0.963 | 7.1 | -4.44 | FS             |
| 2 | 9785123  | 9  | 16 | 0,8,8   | 0,1,1   | nonsyn | ANKRD3 | -0.898 | 0.274  | 1101 | 9.67 | 85.15  | 43.5   | -0.019  | 5  | 3.03E-03 | 52.13 | 0 | -1.734 | 3 | 0.3   | -1.734 | 5.6 | -     | QD             |
| 2 | 9785295  | 18 | 16 | 0,5,5   | 0,13,13 | nonsyn | ANKRD3 | -0.755 | 0.019  | 2771 | 0.53 | 107.11 | 328.16 | -0.0112 | 18 | 0.011    | 48.19 | 0 | -0.417 | 0 | 11.62 | 1.32   | 0.7 | 1.92  | FS             |
| 2 | 9785862  | 2  | 16 | 0,1,1   | 0,1,1   | nonsyn | ANKRD3 | 1.69   | 0.616  | 2055 | 45.1 | 62.16  | 12.01  | -0.0018 | 2  | 1.21E-03 | 56.49 | 0 | -2.9   | 1 | 1.0   | 1.31   | 7.2 | -     | FS             |
| 2 | 9786047  | 18 | 16 | 0,5,5   | 0,13,13 | nonsyn | ANKRD3 | 3.95   | 0.589  | 4627 | 9.32 | 173.3  | 644.2  | -0.011  | 18 | 0.011    | 41.58 | 0 | 0.045  | 1 | 13.81 | 1.32   | 0.6 | -     | FS             |
| 2 | 9786794  | 8  | 16 | 0,3,3   | 0,5,5   | nonsyn | ANKRD3 | 1.09   | 0.135  | 3549 | 1.57 | 74.22  | 106.08 | -0.0081 | 8  | 4.84E-03 | 58.49 | 0 | -3.092 | 1 | 3.4   | -0.65  | 0.5 | -     | QD             |
| 2 | 9786795  | 7  | 16 | 0,3,3   | 0,4,4   | nonsyn | ANKRD3 | -0.907 | 0.194  | 3540 | 6.23 | 72.3   | 75.46  | -0.0073 | 7  | 4.23E-03 | 58.58 | 0 | -2.49  | 1 | 3.0   | -2.089 | 1.3 | -     | QD             |
| 2 | 9786796  | 7  | 16 | 0,3,3   | 0,4,4   | nonsyn | ANKRD3 | 2.71   | 0.425  | 3531 | 6.65 | 71.43  | 65.47  | -0.0073 | 7  | 4.23E-03 | 58.59 | 0 | -2.49  | 1 | 2.4   | -2.428 | 1.5 | -     | QD             |
| 2 | 9786808  | 2  | 16 | 0,1,1   | 0,1,1   | nonsyn | ANKRD3 | -2.253 | 1.08   | 2974 | 0    | 71.59  | 72.78  | -0.0013 | 2  | 1.21E-03 | 55.29 | 0 | 0.398  | 0 | 4.4   | 1.99   | 0.7 | 0.873 | FS             |
| 2 | 9786993  | 10 | 16 | 0,10,10 | 0,0,0   | nonsyn | ANKRD3 | -2.994 | 0.162  | 2819 | 0    | 76.68  | 22.9   | -0.0067 | 7  | 4.23E-03 | 56.93 | 0 | -4.304 | 1 | 0.3   | 2.48   | 0.7 | -     | MQRankSum      |
| 2 | 9787556  | 3  | 16 | 0,0,0   | 0,3,3   | nonsyn | ANKRD3 | 1.7    | 0.43   | 2454 | 1.17 | 76.94  | 201.89 | -0.0019 | 3  | 1.81E-03 | 59.45 | 0 | 0.698  | 0 | 9.3   | 0.241  | 0.7 | 1.11  | DP             |
| 2 | 9789949  | 14 | 16 | 0,1,1   | 0,13,13 | nonsyn | ANKRD3 | 1.21   | 0.192  | 1777 | 0    | 61.55  | 56.5   | -0.0115 | 14 | 8.53E-03 | 32.14 | 0 | 0.694  | 7 | 4.9   | 0.64   | 0.3 | 1.87  | FS             |
| 2 | 9790959  | 40 | 16 | 0,35,35 | 0,2,2   | nonsyn | ANKRD3 | 4.8    | 0.109  | 3056 | 15.7 | 69.06  | 28.08  | -0.0302 | 36 | 0.022    | 33.91 | 0 | -0.989 | 1 | 0.8   | 0.82   | 8.6 | -     | FS             |
| 2 | 9790971  | 4  | 16 | 0,4,4   | 0,0,0   | nonsyn | ANKRD3 | 2.22   | -0.786 | 1051 | 33.2 | 93.41  | 30.35  | -0.0025 | 2  | 1.21E-03 | 29.02 | 0 | 0.029  | 2 | 0.1   | 1.41   | 4.7 | -     | FS             |
| 2 | 9791110  | 7  | 16 | 0,3,3   | 0,2,2   | nonsyn | ANKRD3 | -0.771 | 1.24   | 1978 | 27.7 | 63.89  | 48.16  | -0.0044 | 7  | 4.23E-03 | 26.7  | 0 | 0.667  | 1 | 3.3   | 0.821  | 7.1 | -     | FS             |
| 5 | 1.8E+08  | 3  | 16 | 0,0,0   | 0,3,3   | nonsyn | CNOT6  | -2.073 | -0.296 | 1899 | 1.15 | 72.51  | 277.99 | -0.0034 | 3  | 1.81E-03 | 60.5  | 0 | 0.205  | 1 | 15.3  | 3.93   | 0.5 | 0.731 | ReadPosRankSum |
| 5 | 1.8E+08  | 3  | 16 | 0,1,1   | 0,2,2   | nonsyn | CNOT6  | -2.529 | -0.128 | 1987 | 1.65 | 63.67  | 92.42  | -0.0023 | 3  | 1.81E-03 | 60.1  | 0 | -1.006 | 1 | 12.85 | 1.54   | 0.5 | 1.83  | DP             |
| 6 | 1.43E+08 | 2  | 16 | 0,1,1   | 0,1,1   | nonsyn | GPR126 | 3.89   | 1.31   | 1674 | 4.37 | 55.12  | 76.86  | -0.0054 | 2  | 1.21E-03 | 60.5  | 0 | 1.1    | 4 | 14.34 | 1.5    | 0.7 | 1.42  | DP             |
| 6 | 1.43E+08 | 9  | 16 | 0,6,6   | 0,3,3   | nonsyn | GPR126 | -0.587 | -0.129 | 1921 | 0    | 71.19  | 154.26 | -0.0057 | 9  | 5.44E-03 | 60.7  | 0 | -0.092 | 1 | 13.76 | 0.556  | 0.7 | 5.63  | FS             |
| 6 | 1.43E+08 | 2  | 16 | 0,2,2   | 0,0,0   | nonsyn | GPR126 | 0.801  | 1.19   | 1876 | 3.21 | 62.19  | 23.84  | -0.0039 | 2  | 1.21E-03 | 60.7  | 0 | 1      | 2 | 12.89 | -0.607 | 1.0 | 1.77  | DP             |
| 7 | 1855776  | 5  | 16 | 0,0,0   | 0,5,5   | nonsyn | MAD1L1 | 0.906  | 0.532  | 1646 | 8.43 | 53.55  | 60.36  | -0.0088 | 5  | 3.02E-03 | 53.86 | 0 | -0.086 | 1 | 14.03 | 0.775  | 0.3 | 1.24  | FS             |
| 7 | 2265161  | 8  | 16 | 1,2,4   | 0,4,4   | nonsyn | MAD1L1 | 1.98   | -0.1   | 1917 | 8.37 | 64.87  | 70.54  | 0.2263  | 8  | 4.83E-03 | 60.8  | 0 | -0.211 | 0 | 16.14 | 0.742  | 0.3 | 2.08  | DP             |
| 7 | 6429230  | 2  | 16 | 0,2,2   | 0,0,0   | nonsyn | ZNF138 | -7.024 | 0.339  | 3237 | 1.78 | 75.09  | 101.38 | -0.0017 | 2  | 1.21E-03 | 60.7  | 0 | 0.212  | 1 | 11.86 | 0.591  | 0.8 | 2.15  | QD             |
| 8 | 5273295  | 31 | 16 | 0,26,26 | 0,1,1   | nonsyn | PCMTD1 | -0.188 | 0.546  | 3317 | 34.8 | 81.51  | 27.44  | -0.0209 | 29 | 0.018    | 54.98 | 0 | -2.038 | 1 | 1.5   | 1.07   | 6.9 | -     | FS             |
| 8 | 5273296  | 2  | 16 | 0,2,2   | 0,0,0   | nonsyn | PCMTD1 | -0.279 | -0.465 | 3405 | 5.99 | 85     | 24.26  | -0.0014 | 1  | 6.05E-04 | 54.31 | 0 | -2.265 | 1 | 1.3   | 0.093  | 4.1 | -     | QD             |
| 8 | 5273296  | 31 | 16 | 0,18,18 | 0,8,8   | nonsyn | PCMTD1 | -1.997 | 0.351  | 3592 | 23.0 | 78.33  | 36.12  | -0.0267 | 29 | 0.018    | 54.8  | 0 | -3.72  | 1 | 1.2   | 1.6    | 8.5 | -     | QD             |
| 8 | 5273298  | 32 | 16 | 0,22,22 | 0,5,5   | nonsyn | PCMTD1 | 1.62   | -0.211 | 3599 | 16.7 | 80.7   | 28.55  | -0.0209 | 24 | 0.015    | 55.28 | 0 | -2.483 | 1 | 0.8   | -0.269 | 9.5 | -     | FS             |
| 8 | 5273300  | 86 | 16 | 0,52,52 | 0,27,27 | nonsyn | PCMTD1 | -1.491 | 0.138  | 4366 | 10.4 | 72.56  | 46.22  | -0.0807 | 88 | 0.053    | 57.58 | 0 | -3.683 | 1 | 1.5   | -1.99  | 1.3 | -     | QD             |
| 8 | 5273302  | 7  | 16 | 0,7,7   | 0,0,0   | nonsyn | PCMTD1 | 0.83   | -0.38  | 3757 | 9.92 | 83.06  | 27.57  | -0.0072 | 4  | 2.42E-03 | 59.26 | 0 | -2.412 | 1 | 1.9   | -1.924 | 4.2 | -     | QD             |
| 8 | 5273307  | 4  | 16 | 0,4,4   | 0,0,0   | nonsyn | PCMTD1 | 2.66   | -0.021 | 2001 | 1.93 | 65.04  | 51.4   | -0.0832 | 2  | 1.21E-03 | 59.1  | 0 | -1.59  | 1 | 0.4   | 1.99   | 0.2 | -     | DP             |
| 8 | 5273311  | 28 | 16 | 0,26,26 | 0,1,1   | nonsyn | PCMTD1 | -1.212 | 0.077  | 1954 | 2.39 | 91.51  | 42.17  | -0.0275 | 21 | 0.013    | 53.89 | 0 | -1.569 | 1 | 0.7   | -0.258 | 1.5 | -     | DP             |

|   |              |     |          |             |             |        |         |        |        |            |            |        |        |         |     |                         |           |   |        |   |           |        |     |    |                    |
|---|--------------|-----|----------|-------------|-------------|--------|---------|--------|--------|------------|------------|--------|--------|---------|-----|-------------------------|-----------|---|--------|---|-----------|--------|-----|----|--------------------|
| 8 | 5273314<br>3 | 31  | 16<br>52 | 0,21,<br>21 | 0,5,5       | nonsyn | PCMTD1  | 0.812  | -0.043 | 1763<br>83 | 0          | 94.92  | 40.05  | -0.0248 | 21  | 0.013                   | 49.<br>79 | 0 | -1.68  | 2 | 0.5       | 1.21   | 0.3 | -  | DP                 |
| 8 | 5273314<br>4 | 77  | 16<br>52 | 0,68,<br>68 | 0,3,3       | nonsyn | PCMTD1  | -2.063 | 0.102  | 1762<br>98 | 1.65<br>1  | 91.6   | 43.64  | -0.0592 | 62  | 0.038                   | 49.<br>3  | 0 | -1.379 | 2 | 0.9       | 0.974  | 1.2 | -  | QD                 |
| 8 | 5273316<br>4 | 59  | 16<br>52 | 1,39,<br>41 | 0,15,1<br>5 | nonsyn | PCMTD1  | -1.913 | 0.042  | 1115<br>01 | 0          | 90.6   | 45.68  | -0.0188 | 46  | 0.028                   | 48.<br>85 | 0 | -1.14  | 2 | 0.7       | 0.256  | 1.0 | -  | QD                 |
| 9 | 1.36E+08     | 16  | 16<br>56 | 0,0,0       | 0,16,1<br>6 | nonsyn | CEL     | -1.291 | 0.913  | 2064<br>2  | 19.5<br>75 | 59.25  | 17.03  | -0.0113 | 13  | 7.85E-03                | 58.<br>53 | 0 | -2.777 | 0 | 0.9       | -1.671 | 8.5 | -  | FS                 |
| 9 | 1.36E+08     | 21  | 16<br>56 | 0,0,0       | 0,21,2<br>1 | nonsyn | CEL     | -1.06  | 0.344  | 2130<br>9  | 34.5<br>05 | 58.57  | 23.06  | -0.0184 | 17  | 0.01                    | 57.<br>88 | 0 | -3.317 | 0 | 1.1       | -1.363 | 6.1 | -  | FS                 |
| 9 | 1.36E+08     | 63  | 16<br>54 | 0,2,2       | 0,59,5<br>9 | nonsyn | CEL     | 1.28   | 0.222  | 2364<br>1  | 21.5<br>79 | 56.25  | 57.35  | 0.3311  | 65  | 0.039                   | 57.<br>77 | 0 | -3.338 | 1 | 2.1       | -0.273 | 2.4 | -  | QD                 |
| 9 | 1.36E+08     | 2,2 | 16<br>56 | 1,1,3       | 0,1,1       | nonsyn | CEL     | 5.33   | 1.18   | 1679<br>2  | 1.13<br>4  | 55.24  | 72.14  | 0.2585  | 2,2 | 1.208e-<br>03,1.208e-03 | 44.<br>63 | 0 | 1.2    | 0 | 25.<br>0  | 0.5    | -   | DP |                    |
| 1 | 4764426<br>9 | 2   | 16<br>54 | 0,2,2       | 0,0,0       | nonsyn | MTCH2   | -5.004 | 1.43   | 9125<br>9  | 3.89<br>9  | 96.69  | 54.78  | -0.0013 | 2   | 1.21E-03                | 59.<br>72 | 0 | 1.41   | 1 | 9.1       | 2.32   | 0.4 | -  | ReadPosRan<br>kSum |
| 1 | 4764723<br>1 | 72  | 16<br>54 | 0,64,<br>64 | 0,0,0       | nonsyn | MTCH2   | 0.49   | 0.11   | 8378<br>8  | 11.9<br>55 | 49.26  | 51.15  | -0.1344 | 96  | 0.058                   | 58.<br>85 | 0 | -1.733 | 1 | 2.8       | -1.386 | 2.1 | -  | QD                 |
| 1 | 4764726<br>1 | 66  | 16<br>56 | 0,60,<br>60 | 0,0,0       | nonsyn | MTCH2   | 1.59   | 0.06   | 8481<br>2  | 15.4<br>26 | 52.61  | 50.41  | -0.1184 | 73  | 0.044                   | 59.<br>04 | 0 | -1.733 | 0 | 2.8       | 0.318  | 2.8 | -  | QD                 |
| 1 | 4766035<br>1 | 42  | 16<br>44 | 0,15,<br>15 | 0,24,2<br>4 | nonsyn | MTCH2   | -0.521 | 0      | 3864<br>9  | 7.76<br>3  | 44.63  | 86.49  | -0.093  | 48  | 0.029                   | 59.<br>63 | 0 | -0.722 | 6 | 2.9       | -1.486 | 0.5 | -  | QD                 |
| 1 | 4766035<br>1 | 38  | 16<br>44 | 0,15,<br>15 | 0,21,2<br>1 | nonsyn | MTCH2   | 0.603  | -0.116 | 3810<br>1  | 9.21<br>4  | 42.14  | 78.14  | -0.0975 | 46  | 0.028                   | 59.<br>63 | 0 | -1.313 | 6 | 2.9       | -1.571 | 0.7 | -  | QD                 |
| 1 | 4766035<br>1 | 7   | 16<br>54 | 0,6,6       | 0,1,1       | nonsyn | MTCH2   | -0.29  | -0.238 | 3567<br>6  | 9.24<br>2  | 71.95  | 31.91  | -0.0053 | 6   | 3.63E-03                | 60        | 0 | -0.276 | 1 | 2.3       | -1.936 | 2.2 | -  | QD                 |
| 1 | 4766056<br>1 | 3   | 16<br>52 | 0,1,1       | 0,1,1       | nonsyn | MTCH2   | 2.52   | 0.747  | 2436<br>1  | 0          | 56.69  | 25.4   | -0.0253 | 3   | 1.82E-03                | 60        | 0 | 0.33   | 2 | 6.3       | -1.809 | 0.7 | -  | ReadPosRan<br>kSum |
| 1 | 1117449<br>2 | 7   | 16<br>54 | 0,3,3       | 0,4,4       | nonsyn | TAS2R19 | 8.85   | 0.968  | 1537<br>77 | 1.11<br>4  | 127.63 | 389.66 | -0.0048 | 7   | 4.23E-03                | 59.<br>52 | 0 | 1.26   | 1 | 14.<br>92 | 0.352  | 0.5 | -  | DP                 |
| 1 | 1117453<br>2 | 16  | 16<br>54 | 0,2,2       | 0,13,1<br>3 | nonsyn | TAS2R19 | 2.53   | -0.202 | 1462<br>08 | 11.6<br>95 | 95.03  | 31.51  | -0.012  | 13  | 7.86E-03                | 58.<br>74 | 0 | -7.132 | 1 | 0.4       | 3.17   | 9.1 | -  | MQRankSu<br>m      |
| 1 | 1117454<br>2 | 12  | 16<br>54 | 0,2,2       | 0,9,9       | nonsyn | TAS2R19 | 3.65   | -0.136 | 1457<br>85 | 20.7<br>26 | 96.23  | 29.31  | -0.0089 | 11  | 6.65E-03                | 58.<br>7  | 0 | -3.384 | 1 | 0.3       | 2.27   | 10. | -  | FS                 |
| 1 | 1117454<br>2 | 2   | 16<br>54 | 0,1,1       | 0,1,1       | nonsyn | TAS2R19 | 3.38   | 0.451  | 1456<br>50 | 6.16<br>4  | 104.35 | 141.88 | -0.0012 | 2   | 1.21E-03                | 59.<br>03 | 0 | 1.36   | 1 | 12.<br>89 | 0.187  | 0.4 | -  | DP                 |
| 1 | 1117454<br>2 | 8   | 16<br>54 | 0,1,1       | 0,6,6       | nonsyn | TAS2R19 | -1.133 | -0.427 | 1457<br>30 | 15.1<br>04 | 97.09  | 28.42  | -0.0062 | 7   | 4.23E-03                | 58.<br>6  | 0 | -3.765 | 1 | 0.5       | 1.96   | 9.0 | -  | MQRankSu<br>m      |
| 1 | 1117456<br>2 | 7   | 16<br>54 | 0,0,0       | 0,6,6       | nonsyn | TAS2R19 | 0.137  | 0.193  | 1455<br>59 | 31.8<br>59 | 97.54  | 32.9   | 0.5581  | 7   | 4.23E-03                | 58.<br>43 | 0 | -4.06  | 1 | 0.9       | -1.17  | 7.7 | -  | FS                 |
| 1 | 1117457<br>2 | 5   | 16<br>54 | 0,0,0       | 0,4,4       | nonsyn | TAS2R19 | 3.46   | 0.613  | 1455<br>49 | 35.0<br>05 | 97.97  | 30.66  | -0.0033 | 4   | 2.42E-03                | 58.<br>78 | 0 | -3.36  | 1 | 1.1       | -1.605 | 7.0 | -  | FS                 |
| 1 | 1117459<br>2 | 5   | 16<br>54 | 0,4,4       | 0,0,0       | nonsyn | TAS2R19 | -0.976 | -0.538 | 1457<br>74 | 11.8<br>69 | 97.15  | 26.07  | -0.004  | 2   | 1.21E-03                | 59.<br>05 | 0 | -3.719 | 1 | 0.0       | -0.538 | 6.7 | -  | MQRankSu<br>m      |
| 1 | 1117460<br>2 | 5   | 16<br>54 | 0,4,4       | 0,0,0       | nonsyn | TAS2R19 | -0.896 | -0.498 | 1458<br>37 | 17.1<br>92 | 97.33  | 25.78  | -0.0045 | 5   | 3.02E-03                | 58.<br>85 | 0 | -4.047 | 1 | 0.3       | -0.538 | 7.1 | -  | MQRankSu<br>m      |
| 1 | 1117461<br>2 | 10  | 16<br>54 | 0,7,7       | 0,1,1       | nonsyn | TAS2R19 | 1.85   | 0.458  | 1466<br>57 | 31.3<br>29 | 97.15  | 27.44  | -0.0081 | 8   | 4.84E-03                | 58.<br>69 | 0 | -5.452 | 1 | 0.5       | -1.55  | 7.8 | -  | FS                 |
| 1 | 1117461<br>2 | 9   | 16<br>54 | 0,7,7       | 0,0,0       | nonsyn | TAS2R19 | 3.65   | 1.06   | 1466<br>68 | 31.0<br>56 | 98.81  | 25.47  | -0.0055 | 9   | 5.44E-03                | 59.<br>28 | 0 | -2.41  | 1 | 0.7       | -0.418 | 8.8 | -  | FS                 |
| 1 | 1117461<br>2 | 9   | 16<br>54 | 0,7,7       | 0,0,0       | nonsyn | TAS2R19 | 1.52   | 0.685  | 1469<br>45 | 33.1<br>59 | 96.86  | 29.12  | -1.8392 | 9   | 5.44E-03                | 58.<br>28 | 0 | -5.886 | 1 | 0.9       | -1.442 | 8.8 | -  | FS                 |
| 1 | 1117463<br>2 | 12  | 16<br>56 | 0,10,<br>10 | 0,0,0       | nonsyn | TAS2R19 | -4.544 | -0.061 | 1469<br>30 | 29.6<br>59 | 98     | 31.27  | -0.0097 | 12  | 7.25E-03                | 58.<br>28 | 0 | -6.545 | 0 | 1.1       | 1.34   | 6.7 | -  | FS                 |
| 1 | 1117464<br>2 | 13  | 16<br>56 | 0,11,<br>11 | 0,0,0       | nonsyn | TAS2R19 | 0.15   | -0.345 | 1467<br>40 | 29.0<br>53 | 97.63  | 29.84  | -0.0106 | 13  | 7.85E-03                | 58.<br>3  | 0 | -6.415 | 0 | 0.9       | 1.84   | 6.7 | -  | FS                 |
| 1 | 1117464<br>2 | 13  | 16<br>56 | 0,11,<br>11 | 0,0,0       | nonsyn | TAS2R19 | -4.157 | 0.371  | 1461<br>31 | 26.0<br>9  | 98.61  | 29.66  | 0.0136  | 13  | 7.85E-03                | 58.<br>24 | 0 | -6.225 | 0 | 1.1       | 1.97   | 6.2 | -  | MQRankSu<br>m      |
| 1 | 1117467<br>2 | 11  | 16<br>56 | 0,11,<br>11 | 0,0,0       | nonsyn | TAS2R19 | -4.124 | 0.125  | 1457<br>51 | 29.0<br>53 | 96.54  | 26.83  | -0.0077 | 9   | 5.44E-03                | 57.<br>35 | 0 | -5.12  | 0 | 0.1       | -0.459 | 6.6 | -  | FS                 |
| 1 | 1117471<br>2 | 10  | 16<br>54 | 0,6,6       | 0,4,4       | nonsyn | TAS2R19 | 2.12   | 0.772  | 1448<br>38 | 2.51<br>2  | 123.3  | 339.17 | -0.0061 | 7   | 4.23E-03                | 57.<br>05 | 0 | -2.914 | 1 | 12.<br>69 | 0.281  | 0.5 | -  | MQRankSu<br>m      |
| 1 | 1117476<br>2 | 3   | 16<br>54 | 0,2,2       | 0,0,0       | nonsyn | TAS2R19 | -2.038 | -0.047 | 7863<br>1  | 0          | 93.7   | 30.05  | -0.0035 | 2   | 1.21E-03                | 57.<br>97 | 0 | -2.408 | 1 | 0.1       | 1.14   | 3.3 | -  | MQRankSu<br>m      |
| 1 | 1117478<br>2 | 8   | 16<br>54 | 0,6,6       | 0,0,0       | nonsyn | TAS2R19 | 0.178  | -0.116 | 7887<br>2  | 2.85<br>7  | 93.49  | 30.25  | -0.0063 | 7   | 4.23E-03                | 58.<br>56 | 0 | -2.862 | 1 | 0.6       | 1.24   | 2.1 | -  | MQRankSu<br>m      |







|   |          |    |    |       |        |        |        |        |        |      |      |        |        |         |    |          |     |   |        |    |     |        |       |       |          |
|---|----------|----|----|-------|--------|--------|--------|--------|--------|------|------|--------|--------|---------|----|----------|-----|---|--------|----|-----|--------|-------|-------|----------|
| 2 | 2962594  | 3  | 16 | 0,2,2 | 0,0,0  | .      | FRG1B  | 0.107  | 0.095  | 1129 | 2.99 | 32.88  | 43.52  | -0.1613 | 2  | 1.21E-03 | 44. | 0 | -1.826 | 1  | 0.6 | 0.49   | 1.6   | -     | QD       |
| 0 | 1        |    | 54 |       |        |        |        |        |        | 48   | 2    |        |        |         |    | 9        |     |   |        | 2  |     | 82     | 2.301 |       |          |
| 2 | 2962595  | 3  | 16 | 0,1,1 | 0,2,2  | .      | FRG1B  | -1.504 | 0.142  | 1068 | 0    | 99.22  | 34.23  | -0.0125 | 2  | 1.21E-03 | 48. | 0 | -1.506 | 1  | 0.4 | 0.09   | 0.4   | -     | QD       |
| 0 | 6        |    | 54 |       |        |        |        |        |        | 03   |      |        |        |         |    | 57       |     |   |        | 1  |     | 59     | 2.284 |       |          |
| 2 | 2962596  | 4  | 16 | 0,3,3 | 0,0,0  | .      | FRG1B  | -1.555 | 0.473  | 1066 | 2.54 | 104.25 | 28.58  | -0.0063 | 2  | 1.21E-03 | 53. | 0 | -1.678 | 1  | 1.0 | -0.673 | 1.7   | -     | QD       |
| 0 | 1        |    | 54 |       |        |        |        |        |        | 86   | 1    |        |        |         |    | 32       |     |   |        | 1  |     | 06     | 2.808 |       |          |
| 2 | 2962597  | 6  | 16 | 0,2,2 | 0,3,3  | .      | FRG1B  | -1.149 | 0.195  | 1108 | 1.58 | 80.94  | 46.42  | -0.0433 | 5  | 3.02E-03 | 48. | 0 | -1.328 | 0  | 0.5 | 1.92   | 0.3   | -     | QD       |
| 0 | 1        |    | 56 |       |        |        |        |        |        | 67   | 3    |        |        |         |    | 5        |     |   |        | 2  |     | 81     | 2.923 |       |          |
| 2 | 2962823  | 4  | 16 | 0,2,2 | 0,1,1  | .      | FRG1B  | 3.02   | -0.339 | 3695 | 1.60 | 114.17 | 17.04  | -0.0024 | 2  | 1.21E-03 | 46. | 0 | -0.016 | 0  | 0.3 | 0.843  | 1.0   | -     | DP       |
| 0 | 3        |    | 56 |       |        |        |        |        |        | 23   | 8    |        |        |         |    | 86       |     |   |        | 3  |     | 06     | 2.982 |       |          |
| 2 | 2962823  | 3  | 16 | 0,2,2 | 0,0,0  | .      | FRG1B  | 0.588  | 0.558  | 3695 | 2.08 | 114.1  | 15.69  | 0.2581  | 2  | 1.21E-03 | 49. | 0 | -0.241 | 0  | 0.2 | -0.073 | 1.2   | -     | DP       |
| 0 | 6        |    | 56 |       |        |        |        |        |        | 16   | 1    |        |        |         |    | 12       |     |   |        | 4  |     | 04     | 3.243 |       |          |
| 2 | 2962826  | 3  | 16 | 0,0,0 | 0,3,3  | .      | FRG1B  | 1.91   | 0.043  | 3343 | 0    | 117.65 | 16.19  | -0.0018 | 3  | 1.81E-03 | 45. | 0 | 0.317  | 0  | 0.3 | -0.181 | 0.5   | -     | DP       |
| 0 | 3        |    | 56 |       |        |        |        |        |        | 14   |      |        |        |         |    | 01       |     |   |        | 5  |     | 86     | 2.969 |       |          |
| 2 | 2962828  | 2  | 16 | 0,2,2 | 0,0,0  | .      | FRG1B  | -1.187 | -0.481 | 1611 | 2.30 | 112.73 | 16.61  | -0.0014 | 2  | 1.21E-03 | 43. | 0 | -1.491 | 0  | 0.3 | 0.668  | 1.5   | -     | DP       |
| 0 | 2        |    | 56 |       |        |        |        |        |        | 47   | 9    |        |        |         |    | 63       |     |   |        | 8  |     | 35     | 2.447 |       |          |
| 2 | 2962829  | 5  | 16 | 0,2,2 | 0,2,2  | .      | FRG1B  | -0.328 | -0.201 | 1595 | 0    | 109.69 | 21.89  | -0.0037 | 5  | 3.02E-03 | 41. | 0 | -0.458 | 0  | 0.0 | -0.442 | 1.7   | -     | DP       |
| 0 | 9        |    | 56 |       |        |        |        |        |        | 94   |      |        |        |         |    | 33       |     |   |        | 6  |     | 58     | 2.747 |       |          |
| 2 | 2963156  | 2  | 16 | 0,0,0 | 0,2,2  | .      | FRG1B  | 2.45   | 0.765  | 2044 | 5.01 | 67.07  | 42.02  | -0.0014 | 2  | 1.21E-03 | 42. | 0 | -2.058 | 0  | 11. | 1.86   | 1.0   | -     | MQRankSu |
| 0 | 2        |    | 56 |       |        |        |        |        |        | 6    |      |        |        |         |    | 42       |     |   |        | 18 |     | 43     | 0.096 | m     |          |
| 2 | 2963264  | 17 | 16 | 0,4,4 | 0,12,1 | .      | FRG1B  | 2.09   | 0.087  | 1399 | 0    | 109.72 | 40.52  | -0.0163 | 14 | 8.45E-03 | 49. | 0 | 0.149  | 0  | 0.6 | -0.952 | 0.5   | -     | QD       |
| 0 | 1        |    | 56 |       | 2      |        |        |        |        | 42   |      |        |        |         |    | 05       |     |   |        | 9  |     | 03     | 1.438 |       |          |
| 2 | 3589392  | 2  | 16 | 0,2,2 | 0,0,0  | nonsyn | RCAN1  | 1.9    | -0.211 | 1992 | 1.42 | 59.97  | 13.77  | -0.0023 | 2  | 1.21E-03 | 60  | 0 | 0.549  | 1  | 17. | 0.634  | 0.4   | 2.29  | DP       |
| 1 | 5        |    | 54 |       |        |        |        |        |        | 2    | 1    |        |        |         |    |          |     |   |        | 11 |     | 26     |       |       |          |
| 2 | 3589395  | 16 | 16 | 0,7,7 | 0,8,8  | nonsyn | RCAN1  | -2.371 | 0      | 1959 | 1.38 | 68.03  | 117.21 | -0.012  | 16 | 9.69E-03 | 60  | 0 | 0.058  | 2  | 12. | 0.151  | 0.8   | 3.22  | DP       |
| 1 | 0        |    | 52 |       |        |        |        |        |        | 4    | 1    |        |        |         |    |          |     |   |        | 78 |     | 72     |       |       |          |
| X | 1948245  | 3  | 16 | 0,1,1 | 1,0,2  | nonsyn | MAP3K1 | -1.732 | 0.192  | 1966 | 2.36 | 64.16  | 22.14  | 0.4168  | 3  | 1.81E-03 | 60  | 0 | 1.23   | 1  | 23. | 0.898  | 0.9   | 0.418 | DP       |
|   | 4        |    | 54 |       |        |        | 5      |        |        | 1    | 2    |        |        |         |    |          |     |   |        | 36 |     | 24     |       |       |          |
| X | 1.15E+08 | 2  | 16 | 0,2,2 | 0,0,0  | nonsyn | PLS3   | 1.52   | 1.33   | 1904 | 8.11 | 61.58  | 27.71  | -0.0016 | 2  | 1.21E-03 | 60  | 0 | -0.067 | 0  | 12  | 1.82   | 0.7   | 1.12  | DP       |
|   |          |    | 56 |       |        |        |        |        |        | 5    | 7    |        |        |         |    |          |     |   |        |    |     | 06     |       |       |          |

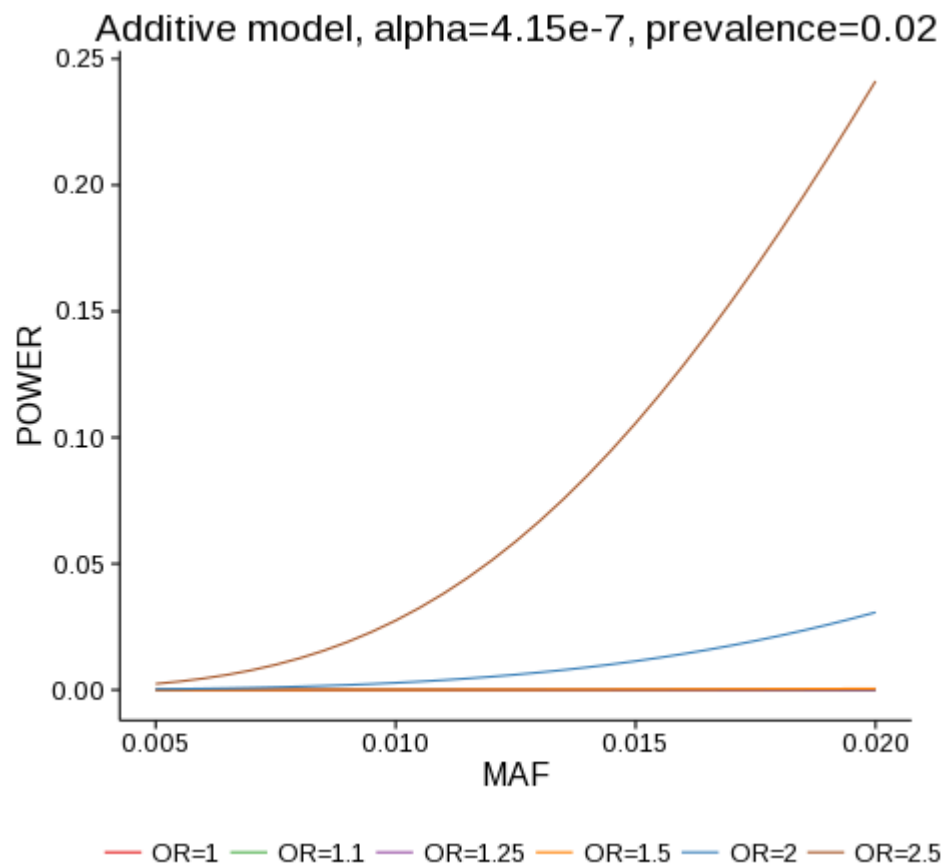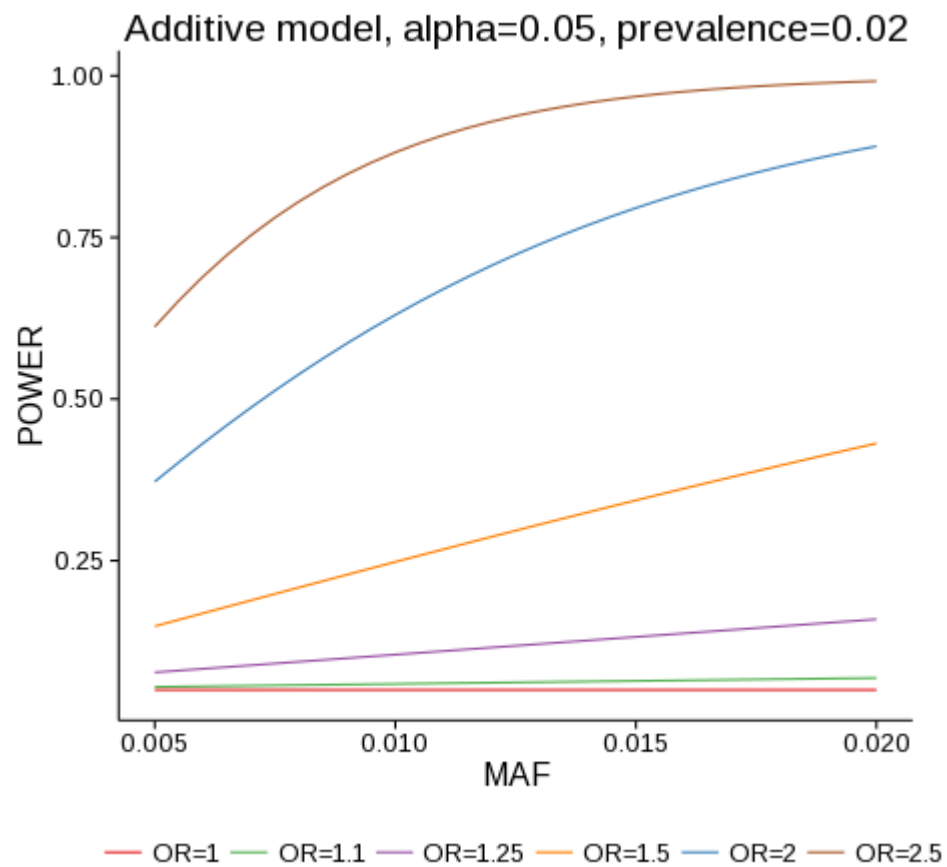

Figure S5 Statistical power of single variant given known allele frequency in WES discovery dataset, using different odds ratio values.

R package 'CaTS' v1.02 (Skol et al., 2006) was used with following parameters: prevalence=0.02; additive model; pimarkers=1; ncases=185; ncontrols=563; alpha=4.15e-7 or 0.05.

Key: MAF, minor allele frequency; OR, odds ratio

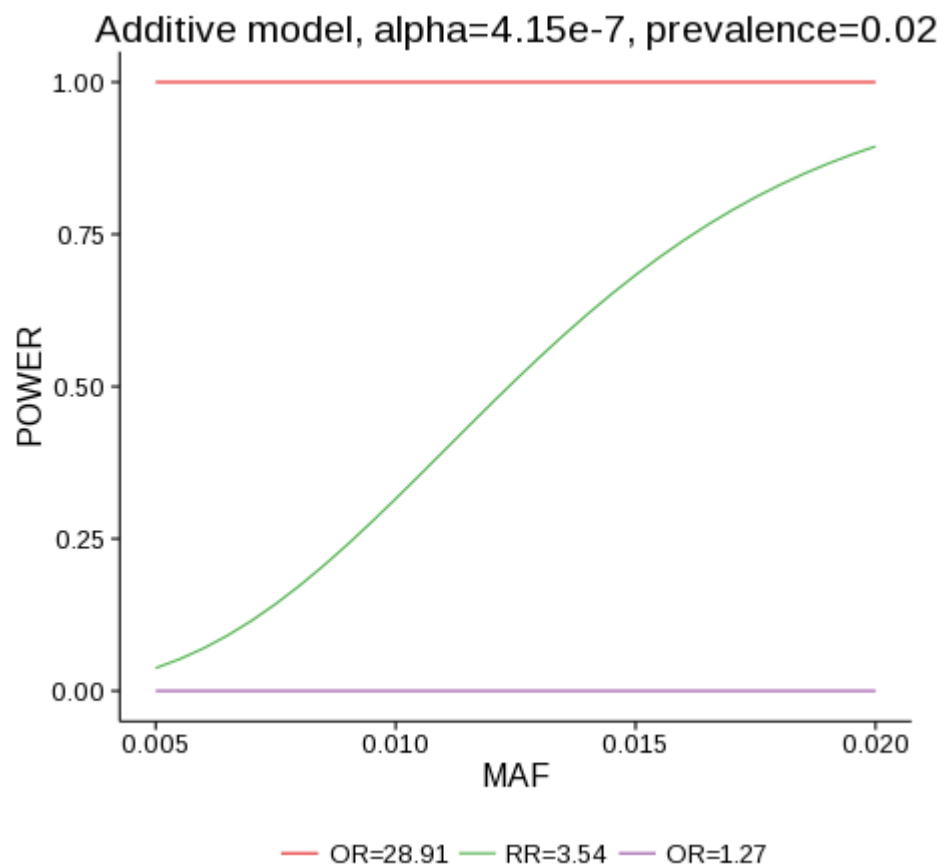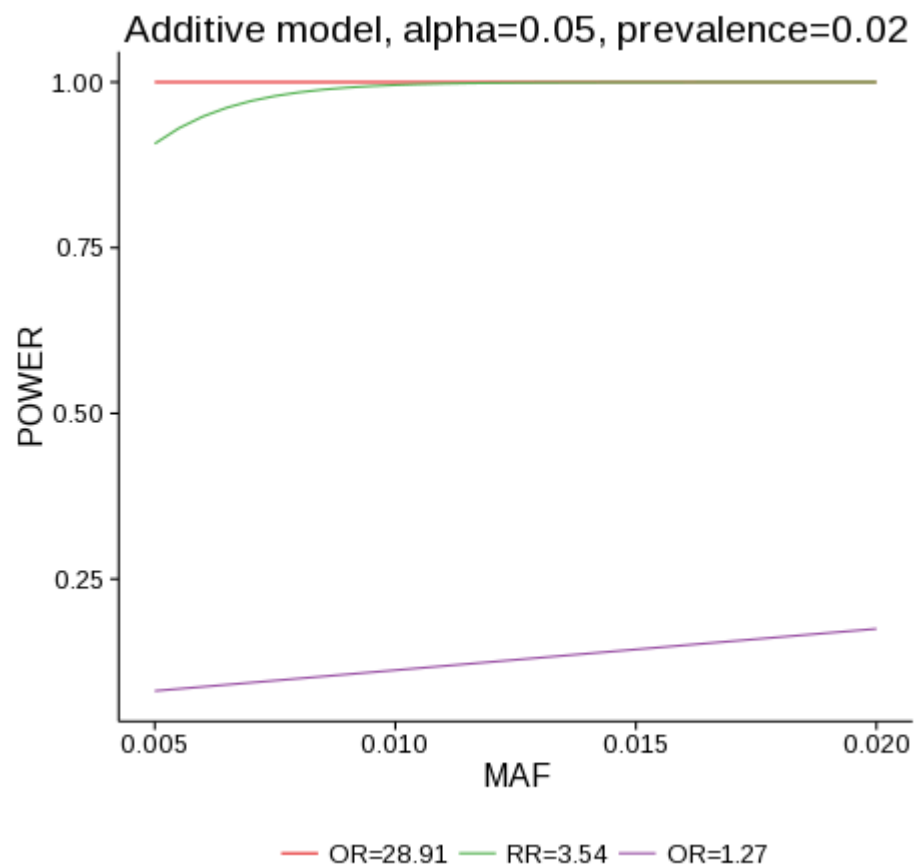

Figure S6 Statistical power of single variant rs141620200 given known allele frequency in WES discovery dataset, using different odds ratio and risk ratio values.

OR=28.91 and RR=3.54 were calculated using allele frequencies, and OR=1.27 was estimated from beta coefficient in q.emmax test. R package 'CaTS' v1.02 (Skol et al., 2006) was used with following parameters: prevalence=0.02; additive model; pimarkers=1; ncases=185; ncontrols=563; alpha=4.15e-7 or 0.05.

Key: maf, minor allele frequency; OR, odds ratio; RR, risk ratio.

## References

- Adzhubei, I.A., Schmidt, S., Peshkin, L., Ramensky, V.E., Gerasimova, A., Bork, P., Kondrashov, A.S., Sunyaev, S.R., 2010. A method and server for predicting damaging missense mutations. *Nat.Methods*. 7, 248-249.
- Bengtsson-Ellmark, S.H., Nilsson, J., Orho-Melander, M., Dahlenborg, K., Groop, L., Bjursell, G., 2004. Association between a polymorphism in the carboxyl ester lipase gene and serum cholesterol profile. *Eur.J.Hum.Genet*. 12, 627-632.
- Carrell, R.W., Lomas, D.A., 2002. Alpha1-antitrypsin deficiency--a model for conformational diseases. *N.Engl.J.Med*. 346, 45-53.
- Cecchini, M.P., Fasano, A., Boschi, F., Osculati, F., Tinazzi, M., 2015. Taste in Parkinson's disease. *J.Neurol*. 262, 806-813.
- Chang, C.C., Chow, C.C., Tellier, L.C., Vattikuti, S., Purcell, S.M., Lee, J.J., 2015. Second-generation PLINK: rising to the challenge of larger and richer datasets. *Gigascience*. 4, 7-015-0047-8. eCollection 2015.
- Chun, S., Fay, J.C., 2009. Identification of deleterious mutations within three human genomes. *Genome Res*. 19, 1553-1561.
- Cingolani, P., Patel, V.M., Coon, M., Nguyen, T., Land, S.J., Ruden, D.M., Lu, X., 2012a. Using *Drosophila melanogaster* as a Model for Genotoxic Chemical Mutational Studies with a New Program, SnpSift. *Front.Genet*. 3, 35.
- Cingolani, P., Platts, A., Wang le, L., Coon, M., Nguyen, T., Wang, L., Land, S.J., Lu, X., Ruden, D.M., 2012b. A program for annotating and predicting the effects of single nucleotide polymorphisms, SnpEff: SNPs in the genome of *Drosophila melanogaster* strain w1118; iso-2; iso-3. *Fly (Austin)*. 6, 80-92.
- Cronin, S., Tomik, B., Bradley, D.G., Slowik, A., Hardiman, O., 2009. Screening for replication of genome-wide SNP associations in sporadic ALS. *Eur.J.Hum.Genet*. 17, 213-218.
- Delaneau, O., Howie, B., Cox, A.J., Zagury, J.F., Marchini, J., 2013. Haplotype estimation using sequencing reads. *Am.J.Hum.Genet*. 93, 687-696.
- DePristo, M.A., Banks, E., Poplin, R., Garimella, K.V., Maguire, J.R., Hartl, C., Philippakis, A.A., del Angel, G., Rivas, M.A., Hanna, M., McKenna, A., Fennell, T.J., Kernytzky, A.M., Sivachenko, A.Y., Cibulskis, K., Gabriel, S.B., Altshuler, D., Daly, M.J., 2011. A framework for variation discovery and genotyping using next-generation DNA sequencing data. *Nat.Genet*. 43, 491-498.
- Dong, C., Wei, P., Jian, X., Gibbs, R., Boerwinkle, E., Wang, K., Liu, X., 2015. Comparison and integration of deleteriousness prediction methods for nonsynonymous SNVs in whole exome sequencing studies. *Hum.Mol.Genet*. 24, 2125-2137.
- Durbin, R., 2014. Efficient haplotype matching and storage using the positional Burrows-Wheeler transform (PBWT). *Bioinformatics*. 30, 1266-1272.
- Graziadei, I., Gaggl, S., Kaserbacher, R., Braunsteiner, H., Vogel, W., 1994. The acute-phase protein alpha 1-antitrypsin inhibits growth and proliferation of human early erythroid progenitor cells (burst-forming units-erythroid) and of human erythroleukemic cells (K562) in vitro by interfering with transferrin iron uptake. *Blood*. 83, 260-268.
- Griswold, A.J., Dueker, N.D., Van Booven, D., Rantus, J.A., Jaworski, J.M., Slifer, S.H., Schmidt, M.A., Hulme, W., Konidari, I., Whitehead, P.L., Cuccaro, M.L., Martin, E.R., Haines, J.L., Gilbert, J.R., Hussman, J.P., Pericak-Vance, M.A., 2015. Targeted massively parallel sequencing of autism spectrum disorder-associated genes in a case control cohort reveals rare loss-of-function risk variants. *Mol.Autism*. 6, 43-015-0034-z. eCollection 2015.

Halbgebauer, S., Nagl, M., Klafki, H., Haussmann, U., Steinacker, P., Oeckl, P., Kassubek, J., Pinkhardt, E., Ludolph, A.C., Soininen, H., Herukka, S.K., Wiltfang, J., Otto, M., 2016. Modified serpinA1 as risk marker for Parkinson's disease dementia: Analysis of baseline data. *Sci.Rep.* 6, 26145.

Hernandez, D.G., Nalls, M.A., Ylikotila, P., Keller, M., Hardy, J.A., Majamaa, K., Singleton, A.B., 2012. Genome wide assessment of young onset Parkinson's disease from Finland. *PLoS One.* 7, e41859.

Huttenlocher, J., Kruger, R., Capetian, P., Lohmann, K., Brockmann, K., Csoti, I., Klein, C., Berg, D., Gasser, T., Bonin, M., Riess, O., Bauer, P., 2015. EIF4G1 is neither a strong nor a common risk factor for Parkinson's disease: evidence from large European cohorts. *J.Med.Genet.* 52, 37-41.

Ihaka, R., Gentleman, R., 1996. R: a language for data analysis and graphics. 5, 299-314.

Kang, H.M., Sul, J.H., Service, S.K., Zaitlen, N.A., Kong, S.Y., Freimer, N.B., Sabatti, C., Eskin, E., 2010. Variance component model to account for sample structure in genome-wide association studies. *Nat.Genet.* 42, 348-354.

Kowalska, A., Danker-Hopfe, H., Wender, M., Florczak, J., Walter, H., 1996. Association between the PI\*M3 allele of alpha 1-antitrypsin and Alzheimer's disease? A preliminary report. *Hum.Genet.* 98, 744-746.

Kumar, P., Henikoff, S., Ng, P.C., 2009. Predicting the effects of coding non-synonymous variants on protein function using the SIFT algorithm. *Nat.Protoc.* 4, 1073-1081.

Li, H., Durbin, R., 2009. Fast and accurate short read alignment with Burrows-Wheeler transform. *Bioinformatics.* 25, 1754-1760.

Lim, E.T., Wurtz, P., Havulinna, A.S., Palta, P., Tukiainen, T., Rehnstrom, K., Esko, T., Magi, R., Inouye, M., Lappalainen, T., Chan, Y., Salem, R.M., Lek, M., Flannick, J., Sim, X., Manning, A., Ladenvall, C., Bumpstead, S., Hamalainen, E., Aalto, K., Maksimow, M., Salmi, M., Blankenberg, S., Ardissino, D., Shah, S., Horne, B., McPherson, R., Hovingh, G.K., Reilly, M.P., Watkins, H., Goel, A., Farrall, M., Girelli, D., Reiner, A.P., Stitzel, N.O., Kathiresan, S., Gabriel, S., Barrett, J.C., Lehtimaki, T., Laakso, M., Groop, L., Kaprio, J., Perola, M., McCarthy, M.I., Boehnke, M., Altshuler, D.M., Lindgren, C.M., Hirschhorn, J.N., Metspalu, A., Freimer, N.B., Zeller, T., Jalkanen, S., Koskinen, S., Raitakari, O., Durbin, R., MacArthur, D.G., Salomaa, V., Ripatti, S., Daly, M.J., Palotie, A., Sequencing Initiative Suomi (SISu) Project, 2014. Distribution and medical impact of loss-of-function variants in the Finnish founder population. *PLoS Genet.* 10, e1004494.

McGurk, L., Lee, V.M., Trojanowski, J.Q., Van Deerlin, V.M., Lee, E.B., Bonini, N.M., 2014. Poly-A binding protein-1 localization to a subset of TDP-43 inclusions in amyotrophic lateral sclerosis occurs more frequently in patients harboring an expansion in C9orf72. *J.Neuropathol.Exp.Neurol.* 73, 837-845.

Nalls, M.A., Pankratz, N., Lill, C.M., Do, C.B., Hernandez, D.G., Saad, M., DeStefano, A.L., Kara, E., Bras, J., Sharma, M., Schulte, C., Keller, M.F., Arepalli, S., Letson, C., Edsall, C., Stefansson, H., Liu, X., Pliner, H., Lee, J.H., Cheng, R., International Parkinson's Disease Genomics Consortium (IPDGC), Parkinson's Study Group (PSG) Parkinson's Research: The Organized GENetics Initiative (PROGENI), 23andMe, GenePD, NeuroGenetics Research Consortium (NGRC), Hussman Institute of Human Genomics (HIHG), Ashkenazi Jewish Dataset Investigator, Cohorts for Health and Aging Research in Genetic Epidemiology (CHARGE), North American Brain Expression Consortium (NABEC), United Kingdom Brain Expression Consortium (UKBEC), Greek Parkinson's Disease Consortium, Alzheimer Genetic Analysis Group, Ikram, M.A., Ioannidis, J.P., Hadjigeorgiou, G.M., Bis, J.C., Martinez, M., Perlmutter, J.S., Goate, A., Marder, K., Fiske, B., Sutherland, M., Xiromerisiou, G., Myers, R.H., Clark, L.N., Stefansson, K., Hardy, J.A., Heutink, P., Chen, H., Wood, N.W., Houlden, H., Payami, H., Brice, A., Scott, W.K., Gasser, T., Bertram, L., Eriksson, N., Foroud, T., Singleton, A.B., 2014. Large-scale meta-analysis of genome-wide association data identifies six new risk loci for Parkinson's disease. *Nat.Genet.* 46, 989-993.

Panicot-Dubois, L., Thomas, G.M., Furie, B.C., Furie, B., Lombardo, D., Dubois, C., 2007. Bile salt-dependent lipase interacts with platelet CXCR4 and modulates thrombus formation in mice and humans. *J.Clin.Invest.* 117, 3708-3719.

Pruim, R.J., Welch, R.P., Sanna, S., Teslovich, T.M., Chines, P.S., Gliedt, T.P., Boehnke, M., Abecasis, G.R., Willer, C.J., 2010. LocusZoom: regional visualization of genome-wide association scan results. *Bioinformatics.* 26, 2336-2337.

Raeder, H., Johansson, S., Holm, P.I., Haldorsen, I.S., Mas, E., Sbarra, V., Neramo, I., Eide, S.A., Grevle, L., Bjorkhaug, L., Sagen, J.V., Aksnes, L., Sovik, O., Lombardo, D., Molven, A., Njolstad, P.R., 2006. Mutations in the CEL VNTR cause a syndrome of diabetes and pancreatic exocrine dysfunction. *Nat.Genet.* 38, 54-62.

Ravenscroft, G., Nolent, F., Rajagopalan, S., Meireles, A.M., Paavola, K.J., Gaillard, D., Alanio, E., Buckland, M., Arbuckle, S., Krivanek, M., Maluenda, J., Pannell, S., Gooding, R., Ong, R.W., Allcock, R.J., Carvalho, E.D., Carvalho, M.D., Kok, F., Talbot, W.S., Melki, J., Laing, N.G., 2015. Mutations of GPR126 are responsible for severe arthrogyriposis multiplex congenita. *Am.J.Hum.Genet.* 96, 955-961.

Reva, B., Antipin, Y., Sander, C., 2011. Predicting the functional impact of protein mutations: application to cancer genomics. *Nucleic Acids Res.* 39, e118.

Schwarz, J.M., Rodelsperger, C., Schuelke, M., Seelow, D., 2010. MutationTaster evaluates disease-causing potential of sequence alterations. *Nat.Methods.* 7, 575-576.

Shihab, H.A., Gough, J., Cooper, D.N., Stenson, P.D., Barker, G.L., Edwards, K.J., Day, I.N., Gaunt, T.R., 2013. Predicting the functional, molecular, and phenotypic consequences of amino acid substitutions using hidden Markov models. *Hum.Mutat.* 34, 57-65.

Shyr, C., Tarailo-Graovac, M., Gottlieb, M., Lee, J.J., van Karnebeek, C., Wasserman, W.W., 2014. FLAGS, frequently mutated genes in public exomes. *BMC Med.Genomics.* 7, 64-014-0064-y.

Skol, A.D., Scott, L.J., Abecasis, G.R., Boehnke, M., 2006. Joint analysis is more efficient than replication-based analysis for two-stage genome-wide association studies. *Nat.Genet.* 38, 209-213.

Tarun, S.Z., Jr, Sachs, A.B., 1996. Association of the yeast poly(A) tail binding protein with translation initiation factor eIF-4G. *EMBO J.* 15, 7168-7177.

Taylor, A.K., Zambaux, J.L., Klisak, I., Mohandas, T., Sparkes, R.S., Schotz, M.C., Lusk, A.J., 1991. Carboxyl ester lipase: a highly polymorphic locus on human chromosome 9qter. *Genomics.* 10, 425-431.

Thomas, J.H., Schneider, S., 2011. Coevolution of retroelements and tandem zinc finger genes. *Genome Res.* 21, 1800-1812.

Tryka, K.A., Hao, L., Sturcke, A., Jin, Y., Wang, Z.Y., Ziyabari, L., Lee, M., Popova, N., Sharopova, N., Kimura, M., Feolo, M., 2014. NCBI's Database of Genotypes and Phenotypes: dbGaP. *Nucleic Acids Res.* 42, D975-9.

Uhlen, M., Fagerberg, L., Hallstrom, B.M., Lindskog, C., Oksvold, P., Mardinoglu, A., Sivertsson, A., Kampf, C., Sjostedt, E., Asplund, A., Olsson, I., Edlund, K., Lundberg, E., Navani, S., Szgyarto, C.A., Odeberg, J., Djureinovic, D., Takanen, J.O., Hober, S., Alm, T., Edqvist, P.H., Berling, H., Tegel, H., Mulder, J., Rockberg, J., Nilsson, P., Schwenk, J.M., Hamsten, M., von Feilitzen, K., Forsberg, M., Persson, L., Johansson, F., Zwahlen, M., von Heijne, G., Nielsen, J., Ponten, F., 2015. Proteomics. Tissue-based map of the human proteome. *Science.* 347, 1260419.

Van der Auwera, G.A., Carneiro, M.O., Hartl, C., Poplin, R., del Angel, G., Levy-Moonshine, A., Jordan, T., Shakir, K., Roazen, D., Thibault, J., Banks, E., Garimella, K.V., Altshuler, D., Gabriel, S., DePristo, M.A., 2002. From FastQ Data to High-Confidence Variant Calls: The Genome Analysis Toolkit Best Practices Pipeline, in: *Anonymous Current Protocols in Bioinformatics.* John Wiley & Sons, Inc.

Wang, K., Li, M., Hakonarson, H., 2010. ANNOVAR: functional annotation of genetic variants from high-throughput sequencing data. *Nucleic Acids Res.* 38, e164.

Westendorf, J.M., Konstantinov, K.N., Wormsley, S., Shu, M.D., Matsumoto-Taniura, N., Pirollet, F., Klier, F.G., Gerace, L., Baserga, S.J., 1998. M phase phosphoprotein 10 is a human U3 small nucleolar ribonucleoprotein component. *Mol.Biol.Cell.* 9, 437-449.

Ylikotila, P., Tiirikka, T., Moilanen, J.S., Kaariainen, H., Marttila, R., Majamaa, K., 2015. Epidemiology of early-onset Parkinson's disease in Finland. *Parkinsonism Relat.Disord.* 21, 938-942.
